1 Title: Vaginal microbiota of adolescents and their mothers: A preliminary study of  
2 vertical transmission and persistence

3

4 Running title: Mother-daughter vaginal microbiota

5

6 **Authors:** Christine M. Bassis (cbassis@umich.edu)<sup>1</sup>, Kaylie A. Bullock  
7 (bullockk@umich.edu)<sup>1</sup>, Daniel E. Sack (sackd@umich.edu)<sup>1</sup>, Katie Saund  
8 (katiephd@umich.edu)<sup>2</sup>, Ali Pirani (apirani@med.umich.edu)<sup>2</sup>, Evan S. Snitkin  
9 (esnitkin@med.umich.edu)<sup>1,2</sup>, Veronica I. Alaniz (veronica.alaniz@ucdenver.edu)<sup>3</sup>,  
10 Elisabeth H. Quint (equint@med.umich.edu)<sup>3</sup>, Vincent B. Young  
11 (youngvi@med.umich.edu)<sup>1,2</sup> and Jason D. Bell (jasonbel@med.umich.edu)<sup>3</sup>.

12

13 1. Division of Infectious Disease, Department of Internal Medicine

14 2. Department of Microbiology and Immunology

15 3. Department of Obstetrics and Gynecology, University of Michigan, Ann Arbor, MI

16 48109

17

18

19 Corresponding author: Christine M. Bassis (cbassis@umich.edu)

20

21

22

23

24 **Abstract**

25 **Background:** Factors that influence vaginal microbiota composition, including its  
26 source, are not well understood. To determine if vaginal microbiota transmission from  
27 mother to daughter at birth influences the human vaginal microbiota composition in  
28 adolescence, we investigated the relationship between the vaginal microbiota of 13  
29 mother/daughter pairs and the daughter's birth mode.

30 **Results:** Based on analysis of bacterial 16S rRNA gene sequences, the vaginal  
31 microbiotas of mother/daughter pairs were more similar to each other if the daughter  
32 was born by vaginal delivery rather than by C-section. Additionally, genome sequences  
33 from an important member of the vaginal microbiota, *Lactobacillus crispatus*, isolated  
34 from one mother/daughter pair in which the daughter was born by vaginal delivery, were  
35 highly similar.

36 **Conclusions:** Both community-level analysis and isolate genome sequence analysis  
37 are consistent with birth-mode dependent transmission and persistence of at least some  
38 members of the vaginal microbiota.

39 **Importance**

40 The composition of the human vaginal microbiota is related to many aspects of health  
41 from infection susceptibility to preterm birth. Our study provides evidence that  
42 transmission of vaginal bacteria from mother to daughter at birth may be an important  
43 factor influencing vaginal microbiota composition into adolescence.

44 **Keywords**

45 Vaginal microbiota, transmission, birth mode, 16S rRNA gene sequences, *Lactobacillus*  
46 *crispatus* genomics

## 47 **Background**

48           The vaginal microbiota plays an important role in human health. The community  
49 structure of the vaginal microbiota is linked to infection susceptibility and preterm birth  
50 (1-6). The composition of the vaginal microbiota is distinct from other body sites and  
51 contains types of bacteria that seem specific to the vagina (7). For example, the vaginal  
52 microbiota is often dominated by specific types of *Lactobacillus*, most commonly *L.*  
53 *crispatus* and *L. iners* (8, 9). Vaginal *Lactobacillus* sp. are thought to maintain  
54 dominance and inhibit colonization of other microbes through lactic acid production (10,  
55 11).

56           Despite strong evidence that the vaginal microbiota can have significant impacts  
57 on health, the factors that influence the composition of the vaginal microbiota are not  
58 well understood. It is not known how this vagina-specific community is maintained from  
59 generation to generation. One possibility is that at least some members of the vaginal  
60 microbiota are transmitted from mother to daughter at birth and maintained in daughters  
61 through adolescence.

62           In healthy babies, the first large, direct exposure to microbes occurs at birth. Birth  
63 mode has been shown to influence the composition of the newborn microbiota (gut,  
64 skin, mouth), likely due to different bacterial exposure in vaginal delivery and C-sections  
65 (12, 13). However, the effect of birth mode on the composition of the vaginal microbiota  
66 has not been investigated. In this study, we compared the vaginal microbiotas of 13  
67 mother/daughter pairs and investigated the effect of birth mode on mother/daughter  
68 microbiota similarity. We also compared the genome sequences from *Lactobacillus*  
69 *crispatus* isolates from one mother/daughter pair. We hypothesized that the vaginal

70 microbiota of mothers and daughters would be more similar if the daughter was born by  
71 vaginal delivery than by C-section.

## 72 **Methods**

### 73 **Subject recruitment and sample collection**

74 Mother/daughter pairs were recruited from the Pediatric and Adolescent  
75 Gynecology Clinic at the University of Michigan Health System in 2014 and 2015.  
76 Exclusions were pregnancy and age of less than 15 years. Written, informed consent  
77 was obtained and participants completed a baseline survey on their demographics and  
78 pertinent gynecologic and medical history. Vaginal samples were self-collected using a  
79 dual-headed swab (Starplex Scientific, S09D) at baseline and then weekly for 4 weeks.  
80 The baseline swab was obtained in the clinic, with immediate storage on ice and  
81 transfer to  $-80^{\circ}\text{C}$  within a few hours. The subsequent swabs were returned via mail at  
82 ambient temperature. After the fifth swab was received and a completion incentive was  
83 mailed to the subject, the link between samples and subject names was destroyed,  
84 irreversibly de-identifying all samples. The study was approved by the University of  
85 Michigan IRB (HUM00086661).

### 86 **DNA isolation and 16S rRNA gene sequencing**

87 One of the swab heads from each sample was clipped directly into the bead plate  
88 of a PowerMag Microbiome RNA/DNA Isolation Kit (Mo Bio Laboratories, Inc.). DNA  
89 isolation was performed according the manufacturer's instructions using an epMotion  
90 5075 liquid handling system. The V4 region of the 16S rRNA gene was amplified from 1  
91 or  $7\mu\text{l}$  DNA and sequenced with a MiSeq (Illumina, San Diego, CA) using the 500 cycle  
92 MiSeq Reagent Kit, v. 2 (Illumina, catalog No. MS-102–2003) by the University of

93 Michigan Microbial Systems Molecular Biology Laboratory as described previously  
94 (14). The other swab head was used for cultivation or stored at -80°C.

### 95 **Bacterial community analysis**

96 The 16S rRNA gene sequences were processed using mothur v.1.36.1 and  
97 v.1.39.5 following the mothur MiSeq SOP (15, 16). Details of the processing steps are  
98 available in [mother.daughter\\_mothur.batch](https://github.com/cbassis/MotherDaughter_Vaginal_Microbiota.study)  
99 ([https://github.com/cbassis/MotherDaughter\\_Vaginal\\_Microbiota.study](https://github.com/cbassis/MotherDaughter_Vaginal_Microbiota.study)). After sequence  
100 processing and alignment to the SILVA reference alignment (Release 102) (17),  
101 sequences were binned into operational taxonomic units (OTUs) based on 97%  
102 sequence similarity using the average neighbor method (18, 19). Samples with fewer  
103 than 1000 sequences were excluded from the analysis. OTUs were classified to the  
104 genus level within mothur using a modified version of the Ribosomal Database Project  
105 (RDP) training set (version 9) (20, 21). To further classify the *Lactobacillus* OTUs,  
106 representative sequences were analyzed using standard nucleotide BLAST for highly  
107 similar sequences (megablast) on the National Center for Biotechnology Information  
108 (NCBI) BLAST web page (<https://blast.ncbi.nlm.nih.gov/Blast.cgi>) (22). OTU relative  
109 abundances were calculated and plotted in a heatmap. To compare bacterial  
110 communities between pairs, within pairs and within subjects, we calculated  $\theta_{YC}$   
111 distances (a metric that takes relative abundances of both shared and non-shared  
112 OTUs into account) (23). A Kruskal-Wallis test with a Dunn's posttest or a Wilcoxon  
113 (Mann-Whitney) test were used to determine if differences in  $\theta_{YC}$  distances were  
114 statistically significant. Principal coordinates analysis (PCoA) was used to visualize the  
115  $\theta_{YC}$  distances between samples. R Studio (Version 1.1.456) with R (Version 3.5.1) was

116 used for the statistical tests and plotting the heat map, box and whisker plots, and the  
117 ordination using the code available:

118 [https://github.com/cbassis/MotherDaughter\\_Vaginal\\_Microbiota.study/tree/master/R\\_co](https://github.com/cbassis/MotherDaughter_Vaginal_Microbiota.study/tree/master/R_code)  
119 [de](#). Adobe Illustrator (CS6) was used for labeling and formatting figures.

### 120 ***Lactobacillus crispatus* isolation**

121 For pair I, the second swab head from the freshly collected baseline vaginal  
122 sample was swabbed onto an MRS agar plate and incubated in an anaerobic chamber  
123 (Coy Laboratory Products) at 37°C. Individual isolates were identified via Sanger  
124 sequencing of the near-full length 16S rRNA gene.

### 125 **DNA isolation and genome sequencing**

126 Three *Lactobacillus crispatus* isolates from pair I, 2 from the mother and 1 from  
127 the daughter, were grown overnight in 1 ml liquid MRS in an anaerobic chamber (Coy  
128 Laboratory Products) at 37°C. Genomic DNA was isolated from the liquid cultures using  
129 the PowerMicrobiome™ RNA Isolation Kit (Mo Bio Laboratories, Inc.) without the DNase  
130 treatment. Genome sequencing was performed by the Microbial Systems Molecular  
131 Biology Laboratory at the University of Michigan using an Illumina Nextera™ sequencing  
132 kit and a MiSeq (Illumina, San Diego, CA).

### 133 **Genome sequence analysis**

134 Phylogenetic relationships between *L. crispatus* isolates from mother/daughter pair I  
135 and all *L. crispatus* strains with genome sequences available as fastq files from NCBI  
136 on December 27th, 2018 were determined based on recombination-filtered single  
137 nucleotide polymorphisms (SNPs). Quality of reads was assessed with FastQC v0.11.3  
138 (24), and Trimmomatic 0.36 (25) was used for trimming adapter sequences and low-

139 quality bases. Variants were identified by (i) mapping filtered reads to reference  
140 genome sequence *L. crispatus* ST1 (SAMEA2272191) using the Burrows-Wheeler  
141 short-read aligner (bwa-0.7.17) (26, 27), (ii) discarding polymerase chain reaction  
142 duplicates with Picard (picard-tools-2.5.0) (28), and (iii) calling variants with SAMtools  
143 (samtools-1.2) and bcftools (29). Variants were filtered from raw results using GATK 's  
144 (GenomeAnalysisTK-3.3-0) VariantFiltration (QUAL, >100; MQ, >50; >=10 reads  
145 supporting variant; and FQ, <0.025) (30). In addition, a custom python script was used  
146 to filter out single-nucleotide variants that were (i) <5 base pairs (bp) in proximity to  
147 indels, (ii) fell under Phage and Repeat region of the reference genome (identified using  
148 Phaster (31) and Nucmer (MUMmer3.23) (32)), (iii) not present in the core genome, or  
149 (iv) in a recombinant region identified by Gubbins 2.3.1 (33). A maximum likelihood tree  
150 was constructed in RAxML 8.2.8 (34) using a general-time reversible model of  
151 sequence evolution. Bootstrap analysis was performed with the number of bootstrap  
152 replicates determined using the bootstrap convergence test and the autoMRE  
153 convergence criteria (-N autoMRE). Bootstrap support values were overlaid on the best  
154 scoring tree identified during rapid bootstrap analysis (-f a). The final maximum  
155 likelihood tree was plotted and pairwise SNP distances were calculated in R Studio  
156 (Version 1.1.463) with R (Version 3.5.3):  
157 [https://github.com/cbassis/MotherDaughter\\_Vaginal\\_Microbiota.study/blob/master/R\\_code/Mother\\_Daughter\\_Figure\\_3\\_Genome\\_Tree\\_and\\_Genome\\_Analysis.Rmd](https://github.com/cbassis/MotherDaughter_Vaginal_Microbiota.study/blob/master/R_code/Mother_Daughter_Figure_3_Genome_Tree_and_Genome_Analysis.Rmd). Adobe  
158 Illustrator (CS6) was used for labeling and formatting the figure.

160 **Calculation of doubling time estimate for vaginal *L. crispatus* *in vivo***

161 We used the number of SNPs between the pair I mother and daughter *L.*  
162 *crispatus* isolates to estimate the doubling time of vaginal *L. crispatus in vivo* if all SNPs  
163 in the recombination-filtered core genome were due to mutations acquired since the  
164 daughter's birth:  
165 Doubling time=(mutation rate)(daughter's age)(genome length)/(# of mutations)  
166 The mutation rate of *L. crispatus* is unknown, so for this estimate we used the published  
167 mutation rate of another *Lactobacillus*, *L. casei* Zhang, *in vitro*, without antibiotics  
168 ( $1.0 \times 10^{-9}$  bp/generation) (35). The pair I daughter's age in hours was: 175,200 hours  
169 =(20 years)(365 days/year)(24 hour/day). The average length of the recombination-  
170 filtered core genome (940,943 bp) was used for genome length. We assumed that the  
171 isolates arose from a common ancestor and that all mutations were non-convergent, so  
172 the number of mutations acquired by each isolate would equal the number of SNPs  
173 between the mother's isolate and the daughter's isolate divided by 2. We also estimated  
174 the number of mutations acquired per isolate core genome per year as (# of  
175 mutations)/(daughter's age)=(# of SNPs)/2(daughter's age).

176

## 177 **Results**

### 178 **Subject characteristics and sequencing results**

179 A total of 107 self-collected, vaginal swab samples were obtained from 26  
180 subjects (13 mother/daughter pairs) (Table 1). Each subject returned 1-5 weekly  
181 samples (median=5 samples/subject, IQR=1). After sequence processing and exclusion  
182 of samples with fewer than 1000 sequences, a total of 2,336,437 high quality bacterial  
183 16S rRNA gene sequences from 101 samples were analyzed with an average of 23,133



184 +/- 10,212 sequences per sample.

| <b>Table 1. Subject Characteristics</b>                |                                              |                                               |                                              |                                               |
|--------------------------------------------------------|----------------------------------------------|-----------------------------------------------|----------------------------------------------|-----------------------------------------------|
|                                                        | <b>Mother (n=13)</b>                         |                                               | <b>Daughter (n=13)</b>                       |                                               |
|                                                        | <b>Daughter's birth mode: Vaginal (n=10)</b> | <b>Daughter's birth mode: C-section (n=3)</b> | <b>Daughter's birth mode: Vaginal (n=10)</b> | <b>Daughter's birth mode: C-section (n=3)</b> |
| <b>Age, mean ± SD, years</b>                           | 44.8±5.6                                     | 54±2.4                                        | 17.1±2.0                                     | 18.7±1.9                                      |
| <b>Race: White (vs. Black, Asian, Hispanic, other)</b> | 90% (n=9)                                    | 100% (n=3)                                    | 90% (n=9)                                    | 100% (n=3)                                    |
| <b>Subject Birth mode: Vaginal (vs. C-section)</b>     | 70% (n=7)                                    | 100% (n=3)                                    | 100% (n=10)                                  | 0% (n=0)                                      |
| <b>Reproductive stage: Premenarchal</b>                | 0% (n=0)                                     | 0% (n=0)                                      | 10% (n=1)                                    | 0% (n=0)                                      |
| <b>Reproductive stage: Reproductive</b>                | 70% (n=7)                                    | 33% (n=1)                                     | 90% (n=9)                                    | 100% (n=3)                                    |
| <b>Reproductive stage: Postmenopausal</b>              | 30% (n=3)                                    | 67% (n=2)                                     | 0% (n=0)                                     | 0% (n=0)                                      |

185

### 186 **An individual's vaginal microbiota is relatively stable over 4 weeks**

187 During the sampling period, the vaginal microbiota of each subject was relatively  
 188 stable. The high stability of the vaginal microbiota is apparent from the consistent within  
 189 subject community composition (Figure 1). For example, high relative abundances of  
 190 OTU1 (*L. crispatus*) and/or OTU2 (*L. iners*) persisted from week to week in many  
 191 subjects. Additionally, average  $\theta_{YC}$  distances were significantly lower within subjects  
 192 than between subjects (Figure 2A) and samples clustered by subject in a PCoA based  
 193 on  $\theta_{YC}$  distances (Supplemental Figure 1).

### 194 **Daughters born via vaginal delivery have greater microbiota similarity with their**

195 **mothers than those born via C-section**

196 To determine if mothers and their daughters had more similar vaginal microbiotas  
197 than unrelated subjects, we compared the average  $\theta_{YC}$  distances between all unrelated  
198 subjects (between pairs) and the average  $\theta_{YC}$  distances between mothers and their own  
199 daughters (within pairs) (Figure 2A). There was a trend toward greater similarity (lower  
200  $\theta_{YC}$  distances) within all mother/daughter pairs than between subjects in different  
201 mother/daughter pairs. To determine if birth mode was related to vaginal microbiota  
202 similarity within mother/daughter pairs, we compared the average within pair  $\theta_{YC}$   
203 distances for pairs in which the daughter was born by vaginal delivery and by C-section  
204 (Figure 2B). The average within pair  $\theta_{YC}$  distances were significantly lower for pairs in  
205 which the daughter was born by vaginal delivery compared to C-section (Fig. 2B).  
206 Therefore, the vaginal microbiotas of daughters born by vaginal delivery were  
207 significantly more similar to their mothers' than the daughters born by C-section were to  
208 their mothers' (Fig. 2B).

209 ***Lactobacillus crispatus* isolates from mother/daughter pair I have highly similar**  
210 **genome sequences**

211 The birth mode-dependent similarity of the vaginal microbiotas of mothers and  
212 their daughters suggested that vaginal bacteria could be transmitted between  
213 generations at birth and persist into adolescence. However, it is possible that genetic or  
214 environmental factors shared by a mother and her daughter lead to acquisition of similar  
215 bacteria later, resulting in the *de novo* establishment of similar vaginal communities. To  
216 investigate the possibility of direct transmission and persistence of one member of the  
217 vaginal microbiota, we generated draft genome sequences of *Lactobacillus crispatus*

218 strains isolated from the freshly collected second swab head of mother/daughter pair I.  
219 The draft genome sequences of these isolates were compared with publicly available *L.*  
220 *crispatus* genome sequences by constructing a maximum likelihood phylogenetic tree  
221 based on a recombination-filtered core genome alignment. Interestingly, the three  
222 strains of *L. crispatus* from mother/daughter pair I, UMP1M1, UMP1M2 and UMP1D1,  
223 were more similar to each other than to any of the other strains, including others  
224 isolated from the female reproductive tract (Fig.3).

225 We also calculated the number of SNPs between our isolates using the  
226 recombination-filtered core genome alignment. There were 11 recombination-filtered  
227 SNPs between the 2 isolates from the mother (UMP1M1 and UMP1M2) and 25 and 16  
228 recombination-filtered SNPs between the daughter's isolate (UMP1D1) and the 2  
229 isolates from the mother (UMP1M1 and UMP1M2, respectively).

### 230 **Estimate of *in vivo* doubling time and mutation rate for vaginal *L. crispatus***

231 To further investigate the plausibility that the *L. crispatus* strain isolated from  
232 daughter I descended from a strain transmitted from her mother at birth, we estimated  
233 the doubling time that would allow our isolates to acquire the observed number of SNPs  
234 over 20 years. Based on the 25 SNPs between UMP1M1 and UMP1D1, the estimated  
235 doubling time for *L. crispatus in vivo* would be 13.2 hours. Based on the 16 SNPs  
236 between UMP1M2 and UMP1D1, the estimated doubling time would be 20.6 hours. We  
237 also estimated the *in vivo* mutation rate of the core genome of the *L. crispatus* isolates  
238 to be 0.4-0.6 mutations per year.

### 239 **Discussion**

240 Our study provides preliminary evidence that the vaginal microbiota may be

241 vertically transmitted from mother to daughter at birth via vaginal delivery and persists  
242 into adolescence. Because the daughters in our study were 15-21 years old, both  
243 transmission and persistence were required to observe evidence of vertical  
244 transmission. The first piece of evidence supporting vertical transmission is that the  
245 vaginal microbiotas of mothers and their adolescent daughters were more similar if their  
246 daughter was born by vaginal delivery rather than C-section. The second piece of  
247 evidence supporting vertical transmission and persistence is that an important member  
248 of the vaginal microbiota, *L. crispatus*, isolated from a vaginally-born, 20-year-old  
249 daughter and her mother (pair I) had highly similar genome sequences.

250 Other studies have compared the vaginal microbiotas of mothers and daughters  
251 without analyzing the effect of birth mode (36-38). One study found greater similarity  
252 between the vaginal microbiotas of mothers and daughters than between unrelated  
253 subjects (38). This was similar to the trend we observed toward greater community  
254 similarity within mother/daughter pairs, regardless of birth mode, than between  
255 unrelated subjects in different mother/daughter pairs (Figure 2A). Notable similarity  
256 between the vaginal microbiota of mothers and daughters was not detected in the other  
257 studies (36, 37). If many of the daughters in the other studies were born by C-section  
258 then high similarity between mothers and daughters would not be expected. With C-  
259 section rates of ~30% in the United States (study site for (37)) and ~36% in South  
260 Korea (study site for (36)) this is a possibility (39, 40). Additionally, our study focused on  
261 adolescent daughters (age 15-21) while the other studies focused on either younger or  
262 older daughters. Since reproductive stage seems to influence the structure of the  
263 vaginal microbiota (41), differences in reproductive stage may contribute to differences

264 in vaginal community composition between mothers and daughters. Finally, we used a  
265 different method of comparing the vaginal microbiotas of mothers and daughters. We  
266 calculated distances between mothers and daughter using  $\theta_{YC}$ , a metric that accounts  
267 for the relative abundances of shared and non-shared OTUs, while the other studies  
268 were based on community types (37) and Unifrac (36). Although an overall community  
269 similarity was not observed in these studies, specific community members  
270 (*Lactobacillus* and *Prevotella*) were identified as most heritable in one study (36).

271         Based on the number of SNPs observed between the mother and daughter *L.*  
272 *crispatus* isolates and published mutations rates for *L. casei* Zhang (35), we estimated  
273 that *L. crispatus* would have an *in vivo* doubling time of 13.2-20.6 hours, depending on  
274 the specific isolates compared. The doubling time estimates of 13.2 hours and  
275 20.6 hours for *L. crispatus in vivo* are within the range estimated for other bacteria in  
276 their natural environments, including *Escherichia coli* (15 hours) and *Salmonella*  
277 *enterica* (25 hours) (42). These doubling times are faster than the 4.1-5.6 days doubling  
278 times measured for *L. casei* Shirota in mouse intestines, where its growth rate was  
279 insufficient to maintain colonization (43). Although the actual growth and mutation rates  
280 of *L. crispatus* in the human vagina have not been measured, we estimated reasonable  
281 *in vivo* doubling times for vaginal *L. crispatus* based on the observed number of SNPs  
282 between *L. crispatus* isolates from mother/daughter pair I, the age of daughter I and *L.*  
283 *casei* Zhang mutation rates. Considering the uncertainty in the estimates, transmission  
284 of *L. crispatus* from mother to daughter at birth followed by the accumulation of  
285 independent mutations during 20 years of persistence in the mother and daughter is a  
286 plausible explanation for the observed recombination-filtered SNPs. Future studies

287 comparing genomes of *L. crispatus* isolates from more mother/daughter pairs with a  
288 variety of daughter ages are needed.

289 The 2 *L. crispatus* isolates from the mother had highly similar genomes, differing  
290 by only 11 recombination-filtered SNPs. A previous study also observed high similarity  
291 between the genomes of multiple vaginal *L. crispatus* isolates from one individual,  
292 noting that they were indistinguishable (44). Future investigations of *L. crispatus*  
293 genomic variation within an individual may yield further insight on colonization and  
294 dynamics of the vaginal microbiota.

295 Consistent with a previous study, *L. crispatus* isolates from the human vagina  
296 were phylogenetically intermixed with isolates from the human urinary tract, including  
297 highly similar vaginal (ERS1867668 (SAMEA104208650)) and bladder (ERS1867667  
298 (SAMEA104208649)) isolates from the same subject (Figure 3) (45).

299 The health implications of vertical transmission of the vaginal microbiota are  
300 unknown and were not addressed in this study. However, because vertical transmission  
301 seems to be an important factor in determining the composition of the vaginal  
302 microbiota there may be important consequences. Vertical transmission of the vaginal  
303 microbiota may be one mechanism for maintaining human microbiota over generations  
304 via a consistent and specific seeding of the newborn microbiota. Delivery mode is an  
305 important factor in determining the early composition of the gut microbiota (46, 47) and  
306 is a risk factor for development of immune-related disorders later in life (48). This  
307 suggests an important role for the mother's vaginal microbiota in seeding the infant and  
308 setting the stage for development of the gut microbiota. Therefore, maintenance of the  
309 vaginal microbiota between generations may be critical for gut microbiota development

310 in each generation.

311           Additionally, the vaginal microbiota plays an important if not well understood role  
312 in reproductive health, with associations between vaginal microbiota composition and  
313 infection susceptibility, BV and preterm birth (1-6). Evidence from this study suggests  
314 that transmission of microbes from mother to daughter at birth may influence the  
315 composition of the daughter's microbiota later in life and may contribute to the  
316 maintenance of specific members of the human vaginal microbiota over generations.

317           This study provides tantalizing evidence of vertical transmission of the vaginal  
318 microbiota. However, this was a small study with only 13 mother/daughter pairs (92%  
319 white) and 3/13 daughters born by C-section. Mothers with daughters born by C-section  
320 were on average older than mothers with daughters born by vaginal delivery (Table 1,  
321 Supplemental Table 1) and two of the three mothers with daughters born by C-section  
322 were post-menopausal which could also contribute to a greater difference in  
323 mother/daughter vaginal microbiotas (41). Beyond birth mode and reproductive status,  
324 other factors including genetics and shared environment could contribute to  
325 mother/daughter vaginal microbiota similarity. Of the eleven pairs asked about  
326 cohabitation, only one pair (IV) reported that they didn't currently live together full or  
327 part-time (Supplemental Table 1). Therefore, the influence of cohabitation on vaginal  
328 microbiota similarity could not be addressed in our study. Genomic analysis of isolates  
329 was limited to one member of the vaginal microbiota from 1 mother/daughter pair.  
330 Future studies in larger populations, including more racially diverse subjects, more  
331 daughters born by C-section and analysis of more isolate genome sequences or  
332 metagenomes are required to validate these findings.

333 **Figures**

334 **Figure 1. Vaginal bacterial community compositions of mother/daughter pairs.**

335 Relative abundances of OTUs in weekly vaginal swab samples from 13  
336 mother/daughter pairs. Mother/daughter pairs were ordered by average within pair  $\theta_{YC}$   
337 distances, with the most similar pair (I) on top and the least similar pair (XIII) on the  
338 bottom. OTUs with a minimum of 200 sequences in the dataset overall and present at a  
339 relative abundance greater than 2% in at least 1 sample were included in the heat map.

340 **Figure 2. Average distances between vaginal bacterial communities.** A. Average

341  $\theta_{YC}$  distances between subjects from different mother/daughter pairs (between pairs),  
342 between subjects within a mother/daughter pair (within pair) and between samples from  
343 the same subject (within subject). P-values for comparisons that were significantly  
344 different by Dunn's posttest are shown (Kruskal-Wallis p-value= 8.154e-10). B. Average  
345  $\theta_{YC}$  distances between subjects within a mother/daughter pair for daughters born by  
346 vaginal birth and by C-section. Wilcoxon (Mann-Whitney) test p-value is shown. In the  
347 box and whiskers plots, the median  $\theta_{YC}$  distance is indicated by a line, values within the  
348 first to the third quartiles are inside the box and the whiskers extend to the smallest and  
349 largest values within 1.5x the interquartile range.

350 **Figure 3. Phylogenetic relationships between *L. crispatus* strains.** Maximum

351 likelihood tree based on recombination-filtered SNP distances between *L. crispatus*  
352 genome sequences of isolates from mother/daughter pair I and other *L. crispatus*  
353 strains with publicly available genomes. Tip labels indicate *L. crispatus* strain names  
354 and NCBI BioSample identifiers. Bootstrap values were greater than or equal to 0.65.

355 **Supplemental Figure 1. Principal coordinates analysis (PCoA) of vaginal**



356 **microbiota from 13 mother/daughter pairs.** The  $\theta_{YC}$  distances between 101 vaginal  
357 microbiota samples are represented by PCoA. Samples from daughters are represented  
358 by triangles and samples from mothers by circles. Each mother/daughter pair is  
359 represented by a unique color. Biplot arrows represent the 3 OTUs most correlated with  
360 position on the PCoA plot.

### 361 **List of abbreviations**

362 C-section: Cesarean section

363 rRNA: ribosomal RNA

364 OTU: operational taxonomic unit

365 SNPs: single nucleotide polymorphisms

366 PCoA: principal coordinates analysis

### 367 **Declarations**

- 368 • Ethics approval and consent to participate

369 All subjects provided written informed consent. The study was approved by the  
370 University of Michigan IRB (HUM00086661).

- 371 • Consent for publication

372 Not applicable.

- 373 • Availability of data and material

374 The raw sequence data generated in this study are available in the NCBI's SRA:

375 Bacterial 16S rRNA gene sequences: BioProject [PRJNA547595](https://bioinformatics.ncbi.nlm.nih.gov/bioproject/547595)

376 *L. crispatus* draft genome sequences: BioProject [PRJNA547620](https://bioinformatics.ncbi.nlm.nih.gov/bioproject/547620)

377 GitHub repository:

378 [https://github.com/cbassis/MotherDaughter\\_Vaginal\\_Microbiota.study](https://github.com/cbassis/MotherDaughter_Vaginal_Microbiota.study)

379 This repository includes:

- 380 • the mothur batch file with steps used to process and analyze 16S rRNA gene
- 381 sequences
- 382 • mothur output files used in final bacterial community analysis and figures
- 383 • R code for manuscript figures, statistics and genomic analysis
- 384 • Competing interests

385 The authors declare that they have no competing interests.

- 386 • Funding

387 Not applicable.

- 388 • Authors' contributions

389 CMB was involved in study design and planning, data analysis, figure preparation  
390 and manuscript writing. KAB was involved in subject recruitment, sample  
391 processing, isolation of *L. crispatus* genomic DNA for sequencing, data analysis and  
392 manuscript editing. DES was involved in subject recruitment, sample processing and  
393 manuscript editing. KS was involved in genomic data analysis, interpretation of  
394 genomic data, phylogenetic tree construction and manuscript editing. AP was  
395 involved in genomic data analysis and manuscript editing. ES was involved in  
396 genomic data analysis and interpretation and manuscript review. VIA was involved in  
397 subject recruitment and planning. EHQ was involved in study design and planning,  
398 subject recruitment and manuscript editing. VBY was involved in study design and  
399 manuscript editing. JDB was involved with study design and planning, subject  
400 recruitment and manuscript editing. All authors read and approved the final  
401 manuscript.

402 • Acknowledgements

403 We'd like to thank the participants who contributed samples. We'd also like to thank  
404 Megan Lemieur for help with study organization and Qualtrics survey implementation  
405 and the University of Michigan Microbial Systems Molecular Biology Laboratory for  
406 swab DNA isolation, bacterial community and genomic library preparation and  
407 sequencing. We'd also like to thank Ingrid Bergin and members of the Young lab for  
408 many discussions related to this project over the years. This research was also  
409 supported in part through computational resources and services provided by  
410 Advanced Research Computing at the University of Michigan, Ann Arbor.

411 **References**

- 412 1. Callahan BJ, DiGiulio DB, Goltsman DSA, Sun CL, Costello EK, Jeganathan P,  
413 Biggio JR, Wong RJ, Druzin ML, Shaw GM, Stevenson DK, Holmes SP, Relman  
414 DA. 2017. Replication and refinement of a vaginal microbial signature of preterm  
415 birth in two racially distinct cohorts of US women. *Proceedings of the National  
416 Academy of Sciences* doi:10.1073/pnas.1705899114.
- 417 2. Sun S, Serrano MG, Fettweis JM, Basta P, Rosen E, Ludwig K, Sorgen AA,  
418 Blakley IC, Wu MC, Dole N, Thorp JM, Siega-Riz AM, Buck GA, Fodor AA, Engel  
419 SM. 2022. Race, the Vaginal Microbiome, and Spontaneous Preterm Birth.  
420 *mSystems* 7:e0001722.
- 421 3. Klatt NR, Cheu R, Birse K, Zevin AS, Perner M, Noël-Romas L, Grobler A,  
422 Westmacott G, Xie IY, Butler J, Mansoor L, McKinnon LR, Passmore J-AS,  
423 Abdool Karim Q, Abdool Karim SS, Burgener AD. 2017. Vaginal bacteria modify  
424 HIV tenofovir microbicide efficacy in African women. *Science (Wash DC)*  
425 356:938.
- 426 4. McClelland RS, Lingappa JR, Srinivasan S, Kinuthia J, John-Stewart GC, Jaoko  
427 W, Richardson BA, Yuhas K, Fiedler TL, Mandaliya KN, Munch MM, Mugo NR,  
428 Cohen CR, Baeten JM, Celum C, Overbaugh J, Fredricks DN. 2018. Evaluation  
429 of the association between the concentrations of key vaginal bacteria and the  
430 increased risk of HIV acquisition in African women from five cohorts: a nested  
431 case-control study. *The Lancet Infectious Diseases* 18:554-564.
- 432 5. Bayigga L, Kateete DP, Anderson DJ, Sekikubo M, Nakanjako D. 2019. Diversity  
433 of vaginal microbiota in sub-Saharan Africa and its effects on HIV transmission  
434 and prevention. *Am J Obstet Gynecol* 220:155-166.
- 435 6. Tamarelle J, Thiébaud ACM, de Barbeyrac B, Bébéar C, Ravel J, Delarocque-  
436 Astagneau E. 2019. The vaginal microbiota and its association with human  
437 papillomavirus, *Chlamydia trachomatis*, *Neisseria gonorrhoeae* and *Mycoplasma*

- 438 genitalium infections: a systematic review and meta-analysis. *Clinical*  
439 *Microbiology and Infection* 25:35-47.
- 440 7. The Human Microbiome Project Consortium. 2012. Structure, function and  
441 diversity of the healthy human microbiome. *Nature* 486:207-214.
- 442 8. Ravel J, Gajer P, Abdo Z, Schneider GM, Koenig SSK, McCulle SL, Karlebach S,  
443 Gorle R, Russell J, Tacket CO, Brotman RM, Davis CC, Ault K, Peralta L, Forney  
444 LJ. 2011. Vaginal microbiome of reproductive-age women. *Proceedings of the*  
445 *National Academy of Sciences* 108:4680-4687.
- 446 9. Bassis CM, Allsworth JE, Wahl HN, Sack DE, Young VB, Bell JD. 2017. Effects  
447 of intrauterine contraception on the vaginal microbiota. *Contraception* 96:189-  
448 195.
- 449 10. O'Hanlon DE, Moench TR, Cone RA. 2013. Vaginal pH and Microbicidal Lactic  
450 Acid When Lactobacilli Dominate the Microbiota. *PLoS ONE* 8:e80074.
- 451 11. Tachedjian G, O'Hanlon DE, Ravel J. 2018. The implausible "in vivo" role of  
452 hydrogen peroxide as an antimicrobial factor produced by vaginal microbiota.  
453 *Microbiome* 6:29.
- 454 12. Dominguez-Bello MG, Costello EK, Contreras M, Magris M, Hidalgo G, Fierer N,  
455 Knight R. 2010. Delivery mode shapes the acquisition and structure of the initial  
456 microbiota across multiple body habitats in newborns. *Proceedings of the*  
457 *National Academy of Sciences* 107:11971-11975.
- 458 13. Madan JC, Hoen AG, Lundgren SN, et al. 2016. Association of cesarean delivery  
459 and formula supplementation with the intestinal microbiome of 6-week-old  
460 infants. *JAMA Pediatrics* 170:212-219.
- 461 14. Seekatz AM, Theriot CM, Molloy CT, Wozniak KL, Bergin IL, Young VB. 2015.  
462 Fecal Microbiota Transplantation Eliminates *Clostridium difficile* in a Murine  
463 Model of Relapsing Disease. *Infection and Immunity* 83:3838-3846.
- 464 15. Kozich JJ, Westcott SL, Baxter NT, Highlander SK, Schloss PD. 2013.  
465 Development of a Dual-Index Sequencing Strategy and Curation Pipeline for  
466 Analyzing Amplicon Sequence Data on the MiSeq Illumina Sequencing Platform.  
467 *Appl Environ Microbiol* 79:5112-5120.
- 468 16. Schloss PD, Westcott SL, Ryabin T, Hall JR, Hartmann M, Hollister EB,  
469 Lesniewski RA, Oakley BB, Parks DH, Robinson CJ, Sahl JW, Stres B,  
470 Thallinger GG, Van Horn DJ, Weber CF. 2009. Introducing mothur: Open-  
471 Source, Platform-Independent, Community-Supported Software for Describing  
472 and Comparing Microbial Communities. *Appl Environ Microbiol* 75:7537-7541.
- 473 17. Schloss PD. 2009. A High-Throughput DNA Sequence Aligner for Microbial  
474 Ecology Studies. *PLoS ONE* 4:e8230.
- 475 18. Westcott SL, Schloss PD. 2015. De novo clustering methods outperform  
476 reference-based methods for assigning 16S rRNA gene sequences to  
477 operational taxonomic units. *PeerJ* 3:e1487.
- 478 19. Schloss PD, Westcott SL. 2011. Assessing and Improving Methods Used in  
479 Operational Taxonomic Unit-Based Approaches for 16S rRNA Gene Sequence  
480 Analysis. *Appl Environ Microbiol* 77:3219-3226.
- 481 20. Wang Q, Garrity GM, Tiedje JM, Cole JR. 2007. Naive Bayesian Classifier for  
482 Rapid Assignment of rRNA Sequences into the New Bacterial Taxonomy. *Appl*  
483 *Environ Microbiol* 73:5261-5267.

- 484 21. Cole JR, Wang Q, Fish JA, Chai B, McGarrell DM, Sun Y, Brown CT, Porras-  
485 Alfaro A, Kuske CR, Tiedje JM. 2014. Ribosomal Database Project: data and  
486 tools for high throughput rRNA analysis. *Nucleic Acids Res* 42:D633-42.
- 487 22. Morgulis A, Coulouris G, Raytselis Y, Madden TL, Agarwala R, Schäffer AA.  
488 2008. Database indexing for production MegaBLAST searches. *Bioinformatics*  
489 (Oxf) 24:1757-1764.
- 490 23. Yue JC, Clayton MK. 2005. A similarity measure based on species proportions.  
491 *Communications in Statistics-Theory and Methods* 34:2123-2131.
- 492 24. Andrews S. FastQC. <http://www.bioinformatics.babraham.ac.uk/projects/fastqc/>.
- 493 25. Bolger AM, Lohse M, Usadel B. 2014. Trimmomatic: a flexible trimmer for  
494 Illumina sequence data. *Bioinformatics (Oxf)* 30:2114-20.
- 495 26. Li H, Durbin R. 2009. Fast and accurate short read alignment with Burrows-  
496 Wheeler transform. *Bioinformatics (Oxf)* 25:1754-60.
- 497 27. BWA. <http://bio-bwa.sourceforge.net>.
- 498 28. Picard <https://broadinstitute.github.io/picard/>.
- 499 29. Calling SNPs/INDELS with SAMtools/BCFtools.  
500 <http://samtools.sourceforge.net/mpileup.shtml>.
- 501 30. McKenna A, Hanna M, Banks E, Sivachenko A, Cibulskis K, Kernytsky A,  
502 Garimella K, Altshuler D, Gabriel S, Daly M, DePristo MA. 2010. The Genome  
503 Analysis Toolkit: a MapReduce framework for analyzing next-generation DNA  
504 sequencing data. *Genome Res* 20:1297-303.
- 505 31. Pon A, Marcu A, Arndt D, Grant JR, Sajed T, Liang Y, Wishart DS. 2016.  
506 PHASTER: a better, faster version of the PHAST phage search tool. *Nucleic*  
507 *Acids Res* 44:W16-W21.
- 508 32. Kurtz S, Phillippy A, Delcher AL, Smoot M, Shumway M, Antonescu C, Salzberg  
509 SL. 2004. Versatile and open software for comparing large genomes. *Genome*  
510 *Biol* 5:R12.
- 511 33. Croucher NJ, Page AJ, Connor TR, Delaney AJ, Keane JA, Bentley SD, Parkhill  
512 J, Harris SR. 2015. Rapid phylogenetic analysis of large samples of recombinant  
513 bacterial whole genome sequences using Gubbins. *Nucleic Acids Res* 43:e15.
- 514 34. Stamatakis A. 2014. RAxML version 8: a tool for phylogenetic analysis and post-  
515 analysis of large phylogenies. *Bioinformatics (Oxford, England)* 30:1312-1313.
- 516 35. Wang J, Dong X, Shao Y, Guo H, Pan L, Hui W, Kwok L-Y, Zhang H, Zhang W.  
517 2017. Genome adaptive evolution of *Lactobacillus casei* under long-term  
518 antibiotic selection pressures. *BMC Genomics* 18:320.
- 519 36. Si J, You HJ, Yu J, Sung J, Ko G. 2016. *Prevotella* as a Hub for Vaginal  
520 Microbiota under the Influence of Host Genetics and Their Association with  
521 Obesity. *Cell Host & Microbe* 21:97-105.
- 522 37. Hickey RJ, Zhou X, Settles ML, Erb J, Malone K, Hansmann MA, Shew ML, Van  
523 Der Pol B, Fortenberry JD, Forney LJ. 2015. Vaginal Microbiota of Adolescent  
524 Girls Prior to the Onset of Menarche Resemble Those of Reproductive-Age  
525 Women. *mBio* 6:e00097-15.
- 526 38. Lee JE, Lee S, Lee H, Song YM, Lee K, Han MJ, Sung J, Ko G. 2013.  
527 Association of the vaginal microbiota with human papillomavirus infection in a  
528 Korean twin cohort. *PLoS One* 8:e63514.

- 529 39. Kim SJ, Kim SJ, Han K-T, Park E-C. 2017. Medical costs, Cesarean delivery  
530 rates, and length of stay in specialty hospitals vs. non-specialty hospitals in  
531 South Korea. PLOS ONE 12:e0188612.
- 532 40. Caughey AB, Cahill AG, Guise J-M, Rouse DJ. 2014. Safe prevention of the  
533 primary cesarean delivery. American Journal of Obstetrics and Gynecology  
534 210:179-193.
- 535 41. Brotman RM, Shardell MD, Gajer P, Fadrosch D, Chang K, Silver MI, Viscidi RP,  
536 Burke AE, Ravel J, Gravitt PE. 2018. Association between the vaginal  
537 microbiota, menopause status, and signs of vulvovaginal atrophy. Menopause  
538 25:1321-1330.
- 539 42. Gibson B, Wilson Daniel J, Feil E, Eyre-Walker A. 2018. The distribution of  
540 bacterial doubling times in the wild. Proceedings of the Royal Society B:  
541 Biological Sciences 285:20180789.
- 542 43. Lee YK, Ho PS, Low CS, Arvilommi H, Salminen S. 2004. Permanent  
543 Colonization by *Lactobacillus casei* Is Hindered by the Low Rate of Cell Division  
544 in Mouse Gut. Appl Environ Microbiol 70:670.
- 545 44. Abdelmaksoud AA, Koparde VN, Sheth NU, Serrano MG, Glascock AL, Fettweis  
546 JM, Strauss JF, 3rd, Buck GA, Jefferson KK. 2016. Comparison of *Lactobacillus*  
547 *crispatus* isolates from *Lactobacillus*-dominated vaginal microbiomes with  
548 isolates from microbiomes containing bacterial vaginosis-associated bacteria.  
549 Microbiology 162:466-75.
- 550 45. Thomas-White K, Forster SC, Kumar N, Van Kuiken M, Putonti C, Stares MD,  
551 Hilt EE, Price TK, Wolfe AJ, Lawley TD. 2018. Culturing of female bladder  
552 bacteria reveals an interconnected urogenital microbiota. Nat Commun 9:1557.
- 553 46. Wampach L, Heintz-Buschart A, Fritz JV, Ramiro-Garcia J, Habier J, Herold M,  
554 Narayanasamy S, Kaysen A, Hogan AH, Bindl L, Bottu J, Halder R, Sjöqvist C,  
555 May P, Andersson AF, de Beaufort C, Wilmes P. 2018. Birth mode is associated  
556 with earliest strain-conferred gut microbiome functions and immunostimulatory  
557 potential. Nature Communications 9:5091.
- 558 47. Rutayisire E, Huang K, Liu Y, Tao F. 2016. The mode of delivery affects the  
559 diversity and colonization pattern of the gut microbiota during the first year of  
560 infants' life: a systematic review. BMC Gastroenterology 16:86.
- 561 48. Tamburini S, Shen N, Wu HC, Clemente JC. 2016. The microbiome in early life:  
562 implications for health outcomes. Nature Medicine 22:713.
- 563



Figure 1

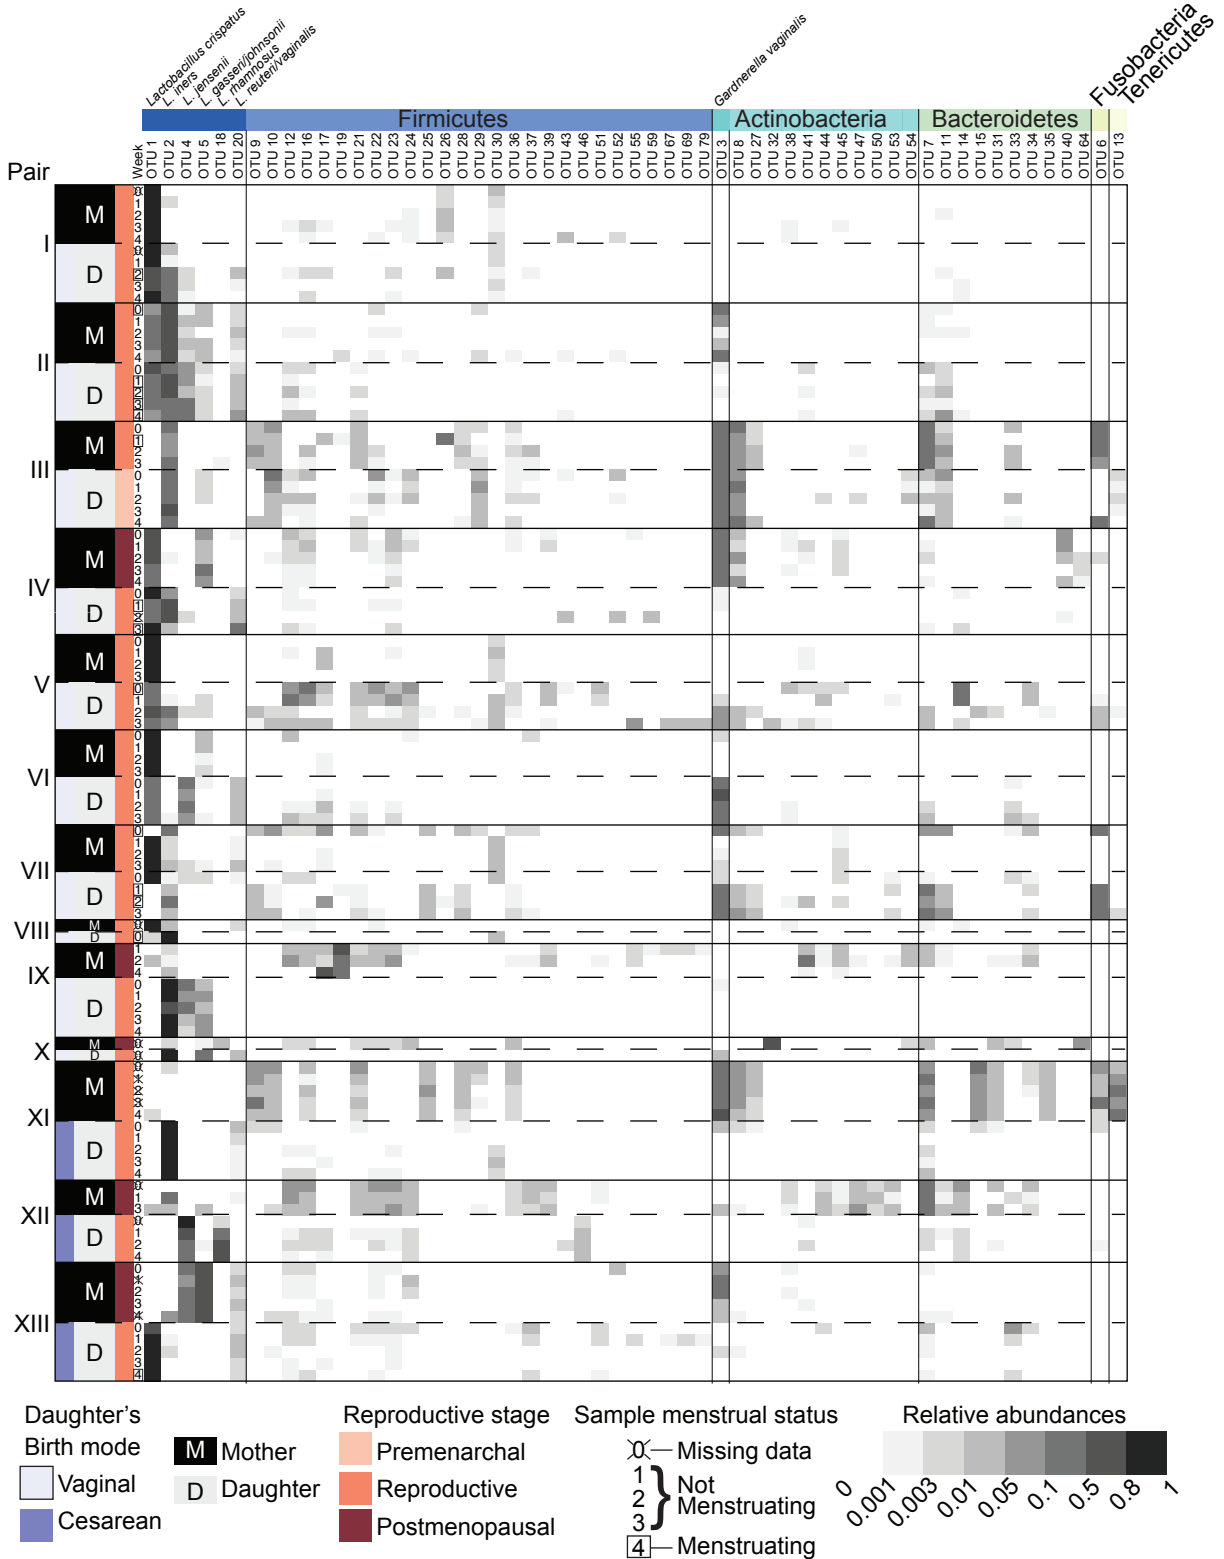

Figure 2

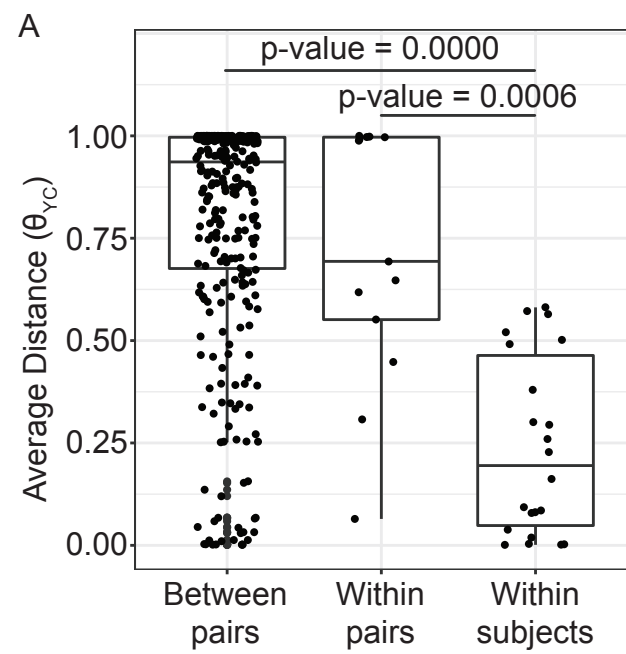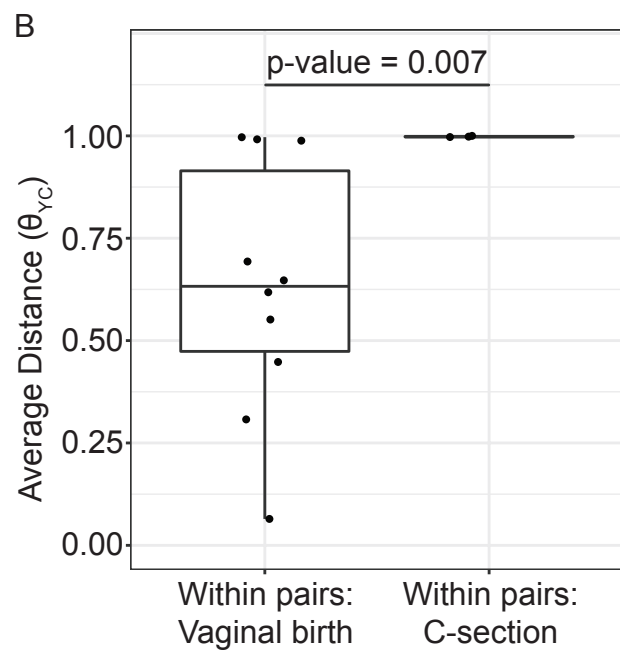



Figure 3

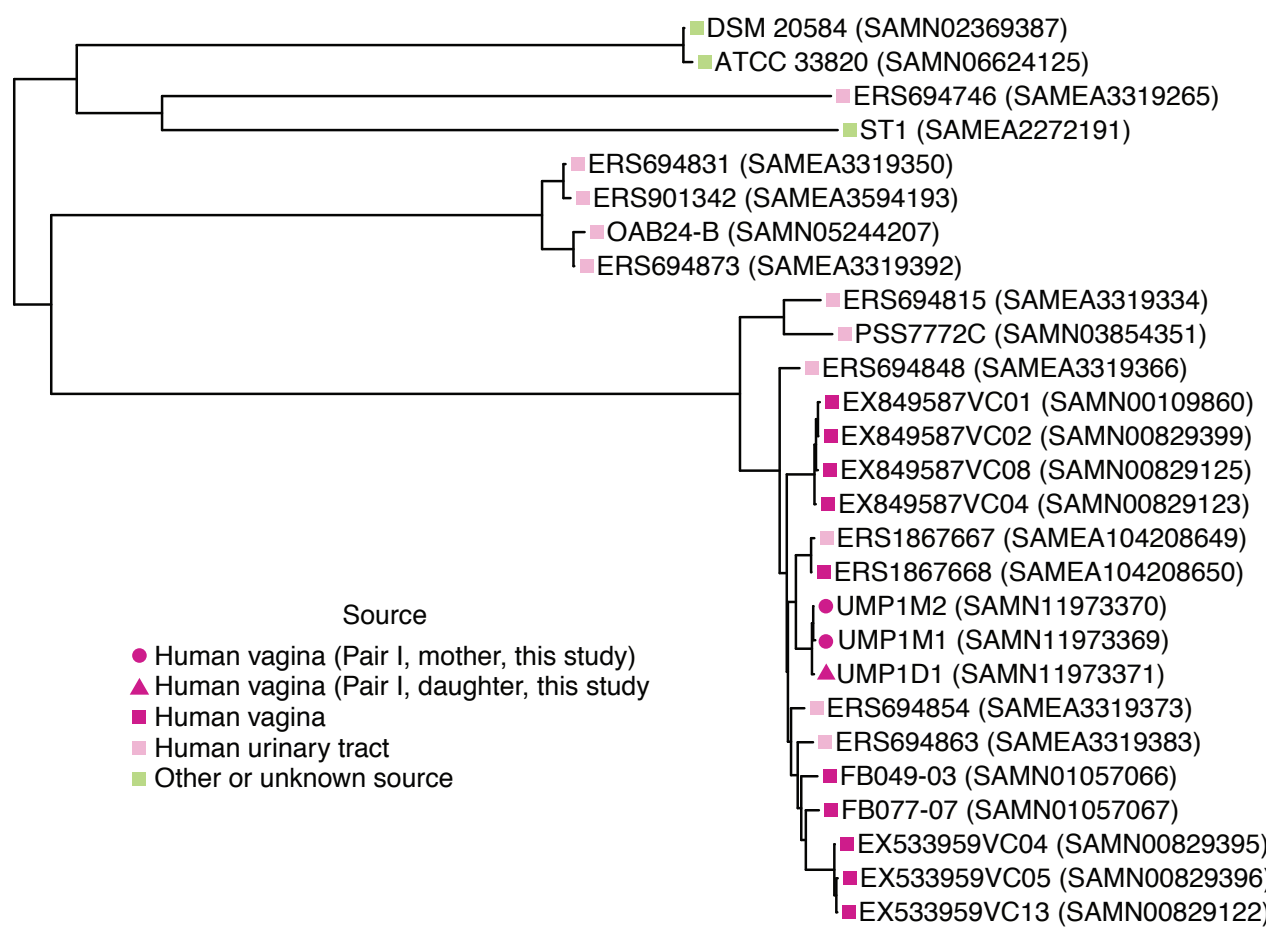

Source: http://biorxiv.org/content/10.1101/768598v3.full.pdf
