1 **Full title:** Vaginal microbiota of adolescents and their mothers: A preliminary study of  
2 vertical transmission and persistence

3 **Short title:** Mother-daughter vaginal microbiota

4 **Authors:** Christine M. Bassis<sup>1\*</sup>, Kaylie A. Bullock<sup>1</sup>, Daniel E. Sack<sup>1</sup>, Katie Saund<sup>2</sup>, Ali  
5 Pirani<sup>2</sup>, Evan S. Snitkin<sup>1,2</sup>, Veronica I. Alaniz<sup>3</sup>, Elisabeth H. Quint<sup>3</sup>, Vincent B. Young<sup>1,2</sup>  
6 and Jason D. Bell<sup>3</sup>.

7 1. Division of Infectious Disease, Department of Internal Medicine

8 2. Department of Microbiology and Immunology

9 3. Department of Obstetrics and Gynecology, University of Michigan, Ann Arbor, MI

10 48109

11 \*Corresponding author

12 E-mail: [cbassis@umich.edu](mailto:cbassis@umich.edu)

13 **Abstract**

14 **Background:** The composition of the human vaginal microbiota is related to many  
15 aspects of health from infection susceptibility to preterm birth. Factors that influence  
16 human vaginal microbiota composition, including its source, are not well understood.

17 **Objective:** The goal of this study was to determine if vaginal microbiota transmission  
18 from mother to daughter at birth influences the human vaginal microbiota composition in  
19 adolescence.

20 **Study Design:** Weekly vaginal swab samples from 13 adolescents and their mothers  
21 were collected for up to 4 weeks. After DNA was isolated from the swabs, the V4 region  
22 of the bacterial 16S rRNA genes were amplified, sequenced and analyzed. We  
23 calculated distances between the bacterial communities in different samples to  
24 investigate the relationship between the vaginal microbiota of the mother/daughter pairs  
25 and the daughter's birth mode. We also cultivated *Lactobacillus crispatus* from the  
26 mother and daughter of 1 pair. To investigate the possibility of direct transmission and  
27 persistence of one member of the vaginal microbiota, we isolated DNA from the *L.*  
28 *crispatus* isolates and compared their genomes with each other and other publicly  
29 available *L. crispatus* genome sequences.

30 **Results:** The vaginal microbiotas of mother/daughter pairs were more similar to each  
31 other if the daughter was born by vaginal delivery rather than by C-section. Additionally,  
32 genome sequences from an important member of the vaginal microbiota, *L. crispatus*,  
33 isolated from one mother/daughter pair in which the daughter was born by vaginal  
34 delivery, were highly similar.

35 **Conclusion:** Both community-level analysis and isolate genome sequence analysis are

36 consistent with birth-mode dependent transmission and persistence of at least some  
37 members of the vaginal microbiota.

38

## 39 **Introduction**

40 The vaginal microbiota plays an important role in human health. The community  
41 structure of the vaginal microbiota is linked to HIV susceptibility and preterm birth (1-3).  
42 The composition of the vaginal microbiota is distinct from other body sites and contains  
43 types of bacteria that seem specific to the vagina (4). For example, the vaginal  
44 microbiota is often dominated by specific types of *Lactobacillus*, most commonly *L.*  
45 *crispatus* and *L. iners* (5, 6). Vaginal *Lactobacillus* sp. are thought to maintain  
46 dominance and inhibit colonization of other microbes through lactic acid production (7,  
47 8).

48 Despite strong evidence that the vaginal microbiota can have significant impacts  
49 on a woman's reproductive tract health, the factors that influence the composition of the  
50 vaginal microbiota are not well understood. It is not known how this vagina-specific  
51 community is maintained from generation to generation. One possibility is that at least  
52 some members of the vaginal microbiota are transmitted from mother to daughter at  
53 birth and maintained in daughters through adolescence.

54 In healthy babies, the first large, direct exposure to microbes occurs at birth. Birth  
55 mode has been shown to influence the composition of the newborn microbiota (gut,  
56 skin, mouth), likely due to different bacterial exposure in vaginal delivery and C-sections  
57 (9-11). However, the effect of birth mode on the composition of the vaginal microbiota  
58 has not been investigated. In this study, we compared the vaginal microbiotas of 13

59 mother/daughter pairs and investigated the effect of birth mode on mother/daughter  
60 microbiota similarity. We also compared the genome sequences from *Lactobacillus*  
61 *crispatus* isolates from one mother/daughter pair. We hypothesized that the vaginal  
62 microbiota of mothers and daughters would be more similar if the daughter was born by  
63 vaginal delivery than by C-section.

## 64 **Materials and Methods**

### 65 **Subject recruitment and sample collection**

66 Mother/daughter pairs were recruited from the Pediatric and Adolescent  
67 Gynecology Clinic at the University of Michigan Health System in 2014 and 2015.  
68 Exclusions were pregnancy and age of less than 15 years. Written, informed consent  
69 was obtained and participants completed a baseline survey on their demographics and  
70 pertinent gynecologic and medical history. Vaginal samples were self-collected using a  
71 dual-headed swab (Starplex Scientific, S09D) at baseline and then weekly for 4 weeks.  
72 The baseline swab was obtained in the clinic, with immediate storage on ice and  
73 transfer to -80°C within a few hours. The subsequent swabs were returned via mail at  
74 ambient temperature. After the fifth swab was received and a completion incentive was  
75 mailed to the subject, the link between samples and subject names was destroyed,  
76 irreversibly de-identifying all samples. The study was approved by the University of  
77 Michigan IRB (HUM00086661).

### 78 **DNA isolation and 16S rRNA gene sequencing**

79 One of the swab heads from each sample was clipped directly into the bead plate  
80 of a PowerMag Microbiome RNA/DNA Isolation Kit (Mo Bio Laboratories, Inc.). DNA  
81 isolation was performed according the manufacturer's instructions using an epMotion

82 5075 liquid handling system. The V4 region of the bacterial 16S rRNA gene was  
83 amplified from 1 or 7 $\mu$ l DNA and sequenced with a MiSeq (Illumina, San Diego, CA)  
84 using the 500 cycle MiSeq Reagent Kit, v. 2 (Illumina, catalog No. MS-102–2003) by the  
85 University of Michigan Microbial Systems Molecular Biology Laboratory as described  
86 previously (12).

### 87 **Bacterial community analysis**

88 The 16S rRNA gene sequences were processed using mothur v.1.36.1 and  
89 v.1.39.5 following the mothur MiSeq SOP (13, 14). Details of the processing steps are  
90 available in [mother.daughter\\_mothur.batch](https://github.com/cbassis/MotherDaughter_Vaginal_Microbiota.study)  
91 ([https://github.com/cbassis/MotherDaughter\\_Vaginal\\_Microbiota.study](https://github.com/cbassis/MotherDaughter_Vaginal_Microbiota.study)). After sequence  
92 processing and alignment to the SILVA reference alignment (Release 102) (15),  
93 sequences were binned into operational taxonomic units (OTUs) based on 97%  
94 sequence similarity using the average neighbor method (16, 17). Samples with fewer  
95 than 1000 sequences were excluded from the analysis. OTUs were classified to the  
96 genus level within mothur using a modified version of the Ribosomal Database Project  
97 (RDP) training set (version 9) (18, 19). To further classify the *Lactobacillus* OTUs,  
98 representative sequences were analyzed using standard nucleotide BLAST for highly  
99 similar sequences (megablast) on the National Center for Biotechnology Information  
100 (NCBI) BLAST web page (<https://blast.ncbi.nlm.nih.gov/Blast.cgi>) (20). To compare  
101 bacterial communities between pairs, within pairs and within subjects, we calculated  $\theta_{YC}$   
102 distances (a metric that takes relative abundances of both shared and non-shared  
103 OTUs into account) (21). A Kruskal-Wallis test with a Dunn's posttest or a Wilcoxon  
104 (Mann-Whitney) test were used to determine if differences in  $\theta_{YC}$  distances were

105 statistically significant. R Studio (Version 1.1.456) with R (Version 3.5.1) was used for  
106 the statistical tests and plotting the heat map, box and whisker plots, and the ordination  
107 using the code available:

108 [https://github.com/cbassis/MotherDaughter\\_Vaginal\\_Microbiota.study/tree/master/R\\_co](https://github.com/cbassis/MotherDaughter_Vaginal_Microbiota.study/tree/master/R_code)  
109 [de](#). Adobe Illustrator (CS6) was used for labeling and formatting all figures.

### 110 ***Lactobacillus crispatus* isolation**

111 For pair I, the second swab head from the freshly collected baseline vaginal  
112 sample was swabbed onto an MRS agar plate and incubated in an anaerobic chamber  
113 (Coy Laboratory Products) at 37°C. Individual isolates were identified via Sanger  
114 sequencing of the near-full length 16S rRNA gene.

### 115 **DNA isolation and genome sequencing**

116 Three *Lactobacillus crispatus* isolates from pair I, 2 from the mother and 1 from  
117 the daughter, were grown overnight in 1 ml liquid MRS in an anaerobic chamber (Coy  
118 Laboratory Products) at 37°C. Genomic DNA was isolated from the liquid cultures using  
119 the PowerMicrobiome™ RNA Isolation Kit (Mo Bio Laboratories, Inc.) without the DNase  
120 treatment. Genome sequencing was performed by the Microbial Systems Molecular  
121 Biology Laboratory at the University of Michigan using an Illumina Nextera™ sequencing  
122 kit and a MiSeq (Illumina, San Diego, CA).

### 123 **Genome sequence analysis**

124 Phylogenetic relationships between *L. crispatus* isolates from mother/daughter pair I  
125 and all *L. crispatus* strains with genome sequences available as fastq files from NCBI  
126 on December 27th, 2018 were determined based on recombination-filtered single  
127 nucleotide polymorphisms (SNPs). Quality of reads was assessed with FastQC v0.11.3

128 (22), and Trimmomatic 0.36 (23) was used for trimming adapter sequences and low-  
129 quality bases. Variants were identified by (i) mapping filtered reads to reference  
130 genome sequence *L. crispatus* ST1 (SAMEA2272191) using the Burrows-Wheeler  
131 short-read aligner (bwa-0.7.17) (24, 25), (ii) discarding polymerase chain reaction  
132 duplicates with Picard (picard-tools-2.5.0) (26), and (iii) calling variants with SAMtools  
133 (samtools-1.2) and bcftools (27). Variants were filtered from raw results using GATK 's  
134 (GenomeAnalysisTK-3.3-0) VariantFiltration (QUAL, >100; MQ, >50; >=10 reads  
135 supporting variant; and FQ, <0.025) (28). In addition, a custom python script was used  
136 to filter out single-nucleotide variants that were (i) <5 base pairs (bp) in proximity to  
137 indels, (ii) fell under Phage and Repeat region of the reference genome (identified using  
138 Phaster (29) and Nucmer (MUMmer3.23) (30)), (iii) not present in the core genome, or  
139 (iv) in a recombinant region identified by Gubbins 2.3.1 (31). A maximum likelihood tree  
140 was constructed in RAxML 8.2.8 (32) using a general-time reversible model of  
141 sequence evolution. Bootstrap analysis was performed with the number of bootstrap  
142 replicates determined using the bootstrap convergence test and the autoMRE  
143 convergence criteria (-N autoMRE). Bootstrap support values were overlaid on the best  
144 scoring tree identified during rapid bootstrap analysis (-f a). The final maximum  
145 likelihood tree was plotted and pairwise SNP distances were calculated in R Studio  
146 (Version 1.1.463) with R (Version 3.5.3):  
147 [https://github.com/cbassis/MotherDaughter\\_Vaginal\\_Microbiota.study/blob/master/R\\_co](https://github.com/cbassis/MotherDaughter_Vaginal_Microbiota.study/blob/master/R_code/Mother_Daughter_Figure_3_Genome_Tree_and_Genome_Analysis.Rmd)  
148 [de/Mother\\_Daughter\\_Figure\\_3\\_Genome\\_Tree\\_and\\_Genome\\_Analysis.Rmd.](https://github.com/cbassis/MotherDaughter_Vaginal_Microbiota.study/blob/master/R_code/Mother_Daughter_Figure_3_Genome_Tree_and_Genome_Analysis.Rmd)  
149 **Calculation of doubling time estimate for vaginal *L. crispatus* *in vivo***

150 We used the number of SNPs between the pair I mother and daughter *L.*  
151 *crispatus* isolates to estimate the doubling time of vaginal *L. crispatus in vivo* if all SNPs  
152 in the recombination-filtered core genome were due to mutations acquired since the  
153 daughter's birth:  
154 Doubling time=(mutation rate)(daughter's age)(genome length)/(# of mutations)  
155 The mutation rate of *L. crispatus* is unknown, so for this estimate we used the published  
156 mutation rate of another *Lactobacillus*, *L. casei* Zhang, *in vitro*, without antibiotics  
157 ( $1.0 \times 10^{-9}$  bp/generation) (33). The pair I daughter's age in hours was: 175,200 hours  
158 =(20 years)(365 days/year)(24 hour/day). The average length of the recombination-  
159 filtered core genome (940,943 bp) was used for genome length. We assumed that the  
160 isolates arose from a common ancestor and that all mutations were non-convergent, so  
161 the number of mutations acquired would equal the number of SNPs between the  
162 mother's isolate and the daughter's isolate divided by 2.

## 163 Results

### 164 Subject characteristics and sequencing results

165 A total of 107 self-collected, vaginal swab samples were obtained from 26  
166 subjects (13 mother/daughter pairs) (Table 1). Each subject returned 1-5 weekly  
167 samples (median=5 samples/subject, IQR=1). After sequence processing and exclusion  
168 of samples with fewer than 1000 sequences, a total of 2,336,437 high quality bacterial  
169 16S rRNA gene sequences from 101 samples were analyzed with an average of 23,133  
170 +/- 10,212 sequences per sample (BioProject [PRJNA547595](https://www.ncbi.nlm.nih.gov/bioproject/PRJNA547595)).

**Table 1. Subject Characteristics**

|  | Mother<br>(n=13) | Daughter<br>(n=13) |
|--|------------------|--------------------|
|  | n (%)            | n (%)              |



|                                                        |            |            |
|--------------------------------------------------------|------------|------------|
| <b>Age, mean <math>\pm</math> SD, years</b>            | 47 $\pm$ 6 | 17 $\pm$ 2 |
| <b>Race: White (vs. Black, Asian, Hispanic, other)</b> | 12 (92)    | 12 (92)    |
| <b>Birth mode: Vaginal (vs. C-section)</b>             | 10 (77)    | 10 (77)    |
| <b>Reproductive stage: Premenarchal</b>                | 0 (0)      | 1 (8)      |
| <b>Reproductive stage: Reproductive</b>                | 8 (62)     | 12 (92)    |
| <b>Reproductive stage: Postmenopausal</b>              | 5 (38)     | 0 (0)      |

171

## 172 **An individual's vaginal microbiota is relatively stable over 4 weeks**

173 During the sampling period, the vaginal microbiota of each subject was relatively  
174 stable. The high stability of the vaginal microbiota is apparent from the consistent within  
175 subject community composition (Fig 1). For example, high relative abundances of OTU1  
176 (*L. crispatus*) and/or OTU2 (*L. iners*) persisted from week to week in many subjects.  
177 Additionally, average  $\theta_{YC}$  distances were significantly lower within subjects than  
178 between subjects (Fig 2A) and samples clustered by subject in a PCoA based on  $\theta_{YC}$   
179 distances (S1 Fig).

### 180 **Fig 1. Vaginal bacterial community compositions of mother/daughter pairs.**

181 Relative abundances of OTUs in weekly vaginal swab samples from 13  
182 mother/daughter pairs. OTU 1 represents *L. crispatus* and OTU 2 represents *L. iners*.  
183 Mother/daughter pairs were ordered by average within pair  $\theta_{YC}$  distances, with the most  
184 similar pair (I) on top and the least similar pair (XIII) on the bottom. OTUs with a  
185 minimum of 200 sequences in the dataset overall and present at a relative abundance  
186 greater than 2% in at least 1 sample were included in the heat map.

### 187 **Fig 2. Average distances between vaginal bacterial communities. A.**

188 Average  $\theta_{YC}$  distances between subjects from different mother/daughter pairs (between  
189 pairs), between subjects within a mother/daughter pair (within pair) and between  
190 samples from the same subject (within subject). P-values for comparisons that were

191 significantly different by Dunn's posttest are shown (Kruskal-Wallis p-value= 8.154e-10).

192 B. Average  $\theta_{YC}$  distances between subjects within a mother/daughter pair for daughters

193 born by vaginal birth and by C-section. Wilcoxon (Mann-Whitney) test p-value is shown.

194 In the box and whiskers plots, the median  $\theta_{YC}$  distance is indicated by a line, values

195 within the first to the third quartiles are inside the box and the whiskers extend to the

196 smallest and largest values within 1.5x the interquartile range.

197 **Daughters born via vaginal delivery have greater microbiota similarity with their**

198 **mothers than those born via C-section**

199 To determine if mothers and their daughters had more similar vaginal microbiotas

200 than unrelated subjects, we compared the average  $\theta_{YC}$  distances between all unrelated

201 subjects (between pairs) and the average  $\theta_{YC}$  distances between mothers and their own

202 daughters (within pairs) (Fig 2A). There was a trend toward greater similarity (lower  $\theta_{YC}$

203 distances) within all mother/daughter pairs than between subjects in different

204 mother/daughter pairs. To determine if birth mode was related to vaginal microbiota

205 similarity within mother/daughter pairs, we compared the average within pair  $\theta_{YC}$

206 distances for pairs in which the daughter was born by vaginal delivery and by C-section

207 (Fig 2B). The average within pair  $\theta_{YC}$  distances were significantly lower for pairs in which

208 the daughter was born by vaginal delivery compared to C-section (Fig 2B). Therefore,

209 the vaginal microbiotas of daughters born by vaginal delivery were significantly more

210 similar to their mothers' than the daughters born by C-section were to their mothers' (Fig

211 2B).

212 ***Lactobacillus crispatus* isolates from mother/daughter pair I have highly similar**

213 **genome sequences**

214 To investigate the possibility of direct transmission and persistence of one  
215 member of the vaginal microbiota, we generated draft genome sequences of  
216 *Lactobacillus crispatus* strains isolated from the freshly collected second swab head of  
217 mother/daughter pair I (NCBI BioProject [PRJNA547620](https://bioproject.ncbi.nlm.nih.gov/BioProject/PRJNA547620)). The draft genome sequences  
218 of these isolates were compared with publicly available *L. crispatus* genome sequences  
219 by constructing a maximum likelihood phylogenetic tree based on a recombination-  
220 filtered core genome alignment. Interestingly, the three strains of *L. crispatus* from  
221 mother/daughter pair I, UMP1M1, UMP1M2 and UMP1D1, were more similar to each  
222 other than to any of the other strains, including others isolated from the female  
223 reproductive tract (Fig 3).

224 **Fig 3. Phylogenetic relationships between *L. crispatus* strains.** Maximum  
225 likelihood tree based on recombination-filtered SNP distances between *L. crispatus*  
226 genome sequences of isolates from mother/daughter pair I and other *L. crispatus*  
227 strains with publicly available genomes. Tip labels indicate *L. crispatus* strain names  
228 and NCBI BioSample identifiers. Bootstrap values were greater than or equal to 0.65.

229 We also calculated the number of SNPs between our isolates using the  
230 recombination-filtered core genome alignment. There were 11 recombination-filtered  
231 SNPs between the 2 isolates from the mother (UMP1M1 and UMP1M2) and 25 and 16  
232 recombination-filtered SNPs between the daughter's isolate (UMP1D1) and the 2  
233 isolates from the mother (UMP1M1 and UMP1M2, respectively).

### 234 **Estimate of *in vivo* doubling time for vaginal *L. crispatus***

235 To further investigate the plausibility that the *L. crispatus* strain isolated from  
236 daughter I descended from a strain transmitted from her mother at birth, we estimated

237 the doubling time that would allow our isolates to acquire the observed number of SNPs  
238 over 20 years. Based on the 25 SNPs between UMP1M1 and UMP1D1, the estimated  
239 doubling time for *L. crispatus in vivo* would be 13.2 hours. Based on the 16 SNPs  
240 between UMP1M2 and UMP1D1, the estimated doubling time would be 20.6 hours.

## 241 **Discussion**

242 Our study provides preliminary evidence that the vaginal microbiota may be  
243 vertically transmitted from mother to daughter at birth via vaginal delivery and persist  
244 into adolescence. Because the daughters in our study were 15-21 years old, both  
245 transmission and persistence were required to observe evidence of vertical  
246 transmission. The first piece of evidence supporting vertical transmission is that the  
247 vaginal microbiotas of mothers and their adolescent daughters were more similar if their  
248 daughter was born by vaginal delivery rather than C-section. The second piece of  
249 evidence supporting vertical transmission and persistence is that an important member  
250 of the vaginal microbiota, *L. crispatus*, isolated from a vaginally-born, 20-year-old  
251 daughter and her mother (pair I) had highly similar genome sequences.

252 Other studies have compared the vaginal microbiotas of mothers and daughters  
253 without detecting notable similarity between them (34, 35). There are multiple reasons  
254 that high similarity between mothers and daughters was not observed in these studies.  
255 First, the effect of birth mode was not analyzed in these previous studies. If many of the  
256 daughters in the other studies were born by C-section then high similarity between  
257 mothers and daughters would not be expected. With C- section rates of ~30% in the  
258 United States (study site for (35)) and ~36% in South Korea (study site for (34)) this is a  
259 possibility (36, 37). Additionally, our study focused on adolescent daughters (age 15-21)

260 while the other studies focused on either younger or older daughters. Since  
261 reproductive stage seems to influence the structure of the vaginal microbiota (38),  
262 differences in reproductive stage may contribute to differences in vaginal community  
263 composition between mothers and daughters. Finally, we used a different method of  
264 comparing the vaginal microbiotas of mothers and daughters. We calculated distances  
265 between mothers and daughter using  $\theta_{YC}$ , a metric that accounts for the relative  
266 abundances of shared and non-shared OTUs, while the other studies were based on  
267 community types (35) and Unifrac (34). Although an overall community similarity was  
268 not observed in these studies, specific community members (*Lactobacillus* and  
269 *Prevotella*) were identified as most heritable in one study (34).

270         Based on the number of SNPs observed between the mother and daughter *L.*  
271 *crispatus* isolates and published mutations rates for *L. casei* Zhang (33), we estimated  
272 that *L. crispatus* would have an *in vivo* doubling time of 13.2-20.6 hours, depending on  
273 the specific isolates compared. The doubling time estimates of 13.2 hours and  
274 20.6 hours for *L. crispatus in vivo* are within the range estimated for other bacteria in  
275 their natural environments, including *Escherichia coli* (15 hours) and *Salmonella*  
276 *enterica* (25 hours) (39). Considering the uncertainty in the estimates, transmission of *L.*  
277 *crispatus* from mother to daughter at birth followed by the accumulation of independent  
278 mutations during 20 years of persistence in the mother and daughter is a plausible  
279 explanation for the observed recombination-filtered SNPs.

280         The 2 *L. crispatus* isolates from the mother had highly similar genomes, differing  
281 by only 11 recombination-filtered SNPs. A previous study also observed high similarity  
282 between the genomes of multiple vaginal *L. crispatus* isolates from one individual,

283 noting that they were indistinguishable (40).

284 Consistent with a previous study, *L. crispatus* isolates from the human vagina  
285 were phylogenetically intermixed with isolates from the human urinary tract, including  
286 highly similar vaginal (ERS1867668 (SAMEA104208650)) and bladder (ERS1867667  
287 (SAMEA104208649)) isolates from the same subject (Fig 3) (41).

288 The health implications of vertical transmission of the vaginal microbiota are  
289 unknown and were not addressed in this study. However, because vertical transmission  
290 seems to be an important factor in determining the composition of the vaginal  
291 microbiota there may be important consequences. Vertical transmission of the vaginal  
292 microbiota may be one mechanism for maintaining human microbiota over generations  
293 via a consistent and specific seeding of the newborn microbiota. Delivery mode is an  
294 important factor in determining the early composition of the gut microbiota (42, 43) and  
295 is a risk factor for development of immune-related disorders later in life (44). This  
296 suggests an important role for the mother's vaginal microbiota in seeding the infant and  
297 setting the stage for development of the gut microbiota. Therefore, maintenance of the  
298 vaginal microbiota between generations may be critical for gut microbiota development  
299 in each generation.

300 Additionally, the vaginal microbiota plays an important if not well understood role  
301 in reproductive health, with associations between vaginal microbiota composition and  
302 infection susceptibility, BV and preterm birth (45-47). Evidence from this study suggests  
303 that transmission of microbes from mother to daughter at birth may influence the  
304 composition of the daughter's microbiota later in life and may contribute to the  
305 maintenance of specific members of the human vaginal microbiota over generations.

306           This study provides tantalizing evidence of vertical transmission of the vaginal  
307 microbiota. However, it was a small study with only 13 mother/daughter pairs (92%  
308 white) and 3/13 daughters born by C-section. Most pairs cohabited at least part-time, so  
309 the influence of cohabitation on vaginal microbiota similarity could not be addressed.  
310 Genomic analysis of isolates was limited to one member of the vaginal microbiota from  
311 1 mother/daughter pair. The mutation rate and growth rate for *L. crispatus* are unknown,  
312 so they had to be estimated in our calculations of doubling time. Future studies in larger  
313 populations, including more racially diverse subjects, more daughters born by C-section  
314 and analysis of more isolate genome sequences or metagenomes are required to  
315 validate these findings.

316

### 317 **Acknowledgements**

318 We'd like to thank the participants who contributed samples. We'd also like to thank  
319 Megan Lemieur for help with study organization and Qualtrics survey implementation  
320 and the University of Michigan Microbial Systems Molecular Biology Laboratory for  
321 swab DNA isolation, bacterial community and genomic library preparation and  
322 sequencing. We'd also like to thank Ingrid Bergin and members of the Young lab for  
323 many discussions related to this project over the years. This research was also  
324 supported in part through computational resources and services provided by Advanced  
325 Research Computing at the University of Michigan, Ann Arbor.

### 326 **References**

327 1. Callahan BJ, DiGiulio DB, Goltsman DSA, Sun CL, Costello EK, Jeganathan P,  
328 et al. Replication and refinement of a vaginal microbial signature of preterm birth in two

- 329 racially distinct cohorts of US women. *Proceedings of the National Academy of*  
330 *Sciences*. 2017.
- 331 2. Klatt NR, Cheu R, Birse K, Zevin AS, Perner M, Noël-Romas L, et al. Vaginal  
332 bacteria modify HIV tenofovir microbicide efficacy in African women. *Science*.  
333 2017;356(6341):938.
- 334 3. McClelland RS, Lingappa JR, Srinivasan S, Kinuthia J, John-Stewart GC, Jaoko  
335 W, et al. Evaluation of the association between the concentrations of key vaginal  
336 bacteria and the increased risk of HIV acquisition in African women from five cohorts: a  
337 nested case-control study. *The Lancet Infectious Diseases*. 2018;18(5):554-64.
- 338 4. Structure, function and diversity of the healthy human microbiome. *Nature*.  
339 2012;486(7402):207-14.
- 340 5. Ravel J, Gajer P, Abdo Z, Schneider GM, Koenig SSK, McCulle SL, et al. Vaginal  
341 microbiome of reproductive-age women. *Proceedings of the National Academy of*  
342 *Sciences*. 2011;108(Supplement 1):4680-7.
- 343 6. Bassis CM, Allsworth JE, Wahl HN, Sack DE, Young VB, Bell JD. Effects of  
344 intrauterine contraception on the vaginal microbiota. *Contraception*. 2017;96(3):189-95.
- 345 7. O’Hanlon DE, Moench TR, Cone RA. Vaginal pH and Microbicidal Lactic Acid  
346 When Lactobacilli Dominate the Microbiota. *PLoS ONE*. 2013;8(11):e80074.
- 347 8. Tachedjian G, O’Hanlon DE, Ravel J. The implausible “in vivo” role of hydrogen  
348 peroxide as an antimicrobial factor produced by vaginal microbiota. *Microbiome*.  
349 2018;6(1):29.
- 350 9. Dominguez-Bello MG, Costello EK, Contreras M, Magris M, Hidalgo G, Fierer N,  
351 et al. Delivery mode shapes the acquisition and structure of the initial microbiota across



- 352 multiple body habitats in newborns. Proceedings of the National Academy of Sciences.  
353 2010;107(26):11971-5.
- 354 10. Madan JC, Hoen AG, Lundgren SN, et al. Association of cesarean delivery and  
355 formula supplementation with the intestinal microbiome of 6-week-old infants. JAMA  
356 Pediatrics. 2016;170(3):212-9.
- 357 11. Shao Y, Forster SC, Tsaliki E, Vervier K, Strang A, Simpson N, et al. Stunted  
358 microbiota and opportunistic pathogen colonization in caesarean-section birth. Nature.  
359 2019;574(7776):117-21.
- 360 12. Seekatz AM, Theriot CM, Molloy CT, Wozniak KL, Bergin IL, Young VB. Fecal  
361 Microbiota Transplantation Eliminates *Clostridium difficile* in a Murine Model of  
362 Relapsing Disease. Infection and Immunity. 2015;83(10):3838-46.
- 363 13. Kozich JJ, Westcott SL, Baxter NT, Highlander SK, Schloss PD. Development of  
364 a Dual-Index Sequencing Strategy and Curation Pipeline for Analyzing Amplicon  
365 Sequence Data on the MiSeq Illumina Sequencing Platform. Applied and Environmental  
366 Microbiology. 2013;79(17):5112-20.
- 367 14. Schloss PD, Westcott SL, Ryabin T, Hall JR, Hartmann M, Hollister EB, et al.  
368 Introducing mothur: Open-Source, Platform-Independent, Community-Supported  
369 Software for Describing and Comparing Microbial Communities. Appl Environ Microbiol.  
370 2009;75(23):7537-41.
- 371 15. Schloss PD. A High-Throughput DNA Sequence Aligner for Microbial Ecology  
372 Studies. PLoS ONE. 2009;4(12):e8230.

- 373 16. Westcott SL, Schloss PD. De novo clustering methods outperform reference-  
374 based methods for assigning 16S rRNA gene sequences to operational taxonomic  
375 units. *PeerJ*. 2015;3:e1487.
- 376 17. Schloss PD, Westcott SL. Assessing and Improving Methods Used in  
377 Operational Taxonomic Unit-Based Approaches for 16S rRNA Gene Sequence  
378 Analysis. *Applied and Environmental Microbiology*. 2011;77(10):3219-26.
- 379 18. Wang Q, Garrity GM, Tiedje JM, Cole JR. Naive Bayesian Classifier for Rapid  
380 Assignment of rRNA Sequences into the New Bacterial Taxonomy. *Appl Environ*  
381 *Microbiol*. 2007;73(16):5261-7.
- 382 19. Cole JR, Wang Q, Fish JA, Chai B, McGarrell DM, Sun Y, et al. Ribosomal  
383 Database Project: data and tools for high throughput rRNA analysis. *Nucleic Acids Res*.  
384 2014;42(Database issue):D633-42.
- 385 20. Morgulis A, Coulouris G, Raytselis Y, Madden TL, Agarwala R, Schäffer AA.  
386 Database indexing for production MegaBLAST searches. *Bioinformatics*.  
387 2008;24(16):1757-64.
- 388 21. Yue JC, Clayton MK. A similarity measure based on species proportions.  
389 *Commun Stat-Theory Methods*. 2005;34(11):2123-31.
- 390 22. Andrews S. FastQC [v0.11.3:[Available from:  
391 <http://www.bioinformatics.babraham.ac.uk/projects/fastqc/>.
- 392 23. Bolger AM, Lohse M, Usadel B. Trimmomatic: a flexible trimmer for Illumina  
393 sequence data. *Bioinformatics*. 2014;30(15):2114-20.
- 394 24. Li H, Durbin R. Fast and accurate short read alignment with Burrows-Wheeler  
395 transform. *Bioinformatics*. 2009;25(14):1754-60.

- 396 25. BWA [Available from: <http://bio-bwa.sourceforge.net>.  
397 26. Picard [Available from: <https://broadinstitute.github.io/picard/>.  
398 27. Calling SNPs/INDELs with SAMtools/BCFtools [Available from:  
399 <http://samtools.sourceforge.net/mpileup.shtml>.  
400 28. McKenna A, Hanna M, Banks E, Sivachenko A, Cibulskis K, Kernytsky A, et al.  
401 The Genome Analysis Toolkit: a MapReduce framework for analyzing next-generation  
402 DNA sequencing data. *Genome Res.* 2010;20(9):1297-303.  
403 29. Pon A, Marcu A, Arndt D, Grant JR, Sajed T, Liang Y, et al. PHASTER: a better,  
404 faster version of the PHAST phage search tool. *Nucleic Acids Research.*  
405 2016;44(W1):W16-W21.  
406 30. Kurtz S, Phillippy A, Delcher AL, Smoot M, Shumway M, Antonescu C, et al.  
407 Versatile and open software for comparing large genomes. *Genome Biol.*  
408 2004;5(2):R12.  
409 31. Croucher NJ, Page AJ, Connor TR, Delaney AJ, Keane JA, Bentley SD, et al.  
410 Rapid phylogenetic analysis of large samples of recombinant bacterial whole genome  
411 sequences using Gubbins. *Nucleic Acids Res.* 2015;43(3):e15.  
412 32. Stamatakis A. RAxML version 8: a tool for phylogenetic analysis and post-  
413 analysis of large phylogenies. *Bioinformatics (Oxford, England).* 2014;30(9):1312-3.  
414 33. Wang J, Dong X, Shao Y, Guo H, Pan L, Hui W, et al. Genome adaptive  
415 evolution of *Lactobacillus casei* under long-term antibiotic selection pressures. *BMC*  
416 *Genomics.* 2017;18(1):320.

- 417 34. Si J, You HJ, Yu J, Sung J, Ko G. *Prevotella* as a Hub for Vaginal Microbiota  
418 under the Influence of Host Genetics and Their Association with Obesity. *Cell Host &*  
419 *Microbe*. 2016;21(1):97-105.
- 420 35. Hickey RJ, Zhou X, Settles ML, Erb J, Malone K, Hansmann MA, et al. Vaginal  
421 Microbiota of Adolescent Girls Prior to the Onset of Menarche Resemble Those of  
422 Reproductive-Age Women. *mBio*. 2015;6(2):e00097-15.
- 423 36. Kim SJ, Kim SJ, Han K-T, Park E-C. Medical costs, Cesarean delivery rates, and  
424 length of stay in specialty hospitals vs. non-specialty hospitals in South Korea. *PLoS*  
425 *ONE*. 2017;12(11):e0188612.
- 426 37. Caughey AB, Cahill AG, Guise J-M, Rouse DJ. Safe prevention of the primary  
427 cesarean delivery. *American Journal of Obstetrics and Gynecology*. 2014;210(3):179-  
428 93.
- 429 38. Brotman RM, Shardell MD, Gajer P, Fadrosh D, Chang K, Silver MI, et al.  
430 Association between the vaginal microbiota, menopause status, and signs of  
431 vulvovaginal atrophy. *Menopause*. 2018;25(11):1321-30.
- 432 39. Gibson B, Wilson Daniel J, Feil E, Eyre-Walker A. The distribution of bacterial  
433 doubling times in the wild. *Proc R Soc B*. 2018;285(1880):20180789.
- 434 40. Abdelmaksoud AA, Koparde VN, Sheth NU, Serrano MG, Glascock AL, Fettweis  
435 JM, et al. Comparison of *Lactobacillus crispatus* isolates from *Lactobacillus*-dominated  
436 vaginal microbiomes with isolates from microbiomes containing bacterial vaginosis-  
437 associated bacteria. *Microbiology*. 2016;162(3):466-75.

- 438 41. Thomas-White K, Forster SC, Kumar N, Van Kuiken M, Putonti C, Stares MD, et  
439 al. Culturing of female bladder bacteria reveals an interconnected urogenital microbiota.  
440 Nat Commun. 2018;9(1):1557.
- 441 42. Wampach L, Heintz-Buschart A, Fritz JV, Ramiro-Garcia J, Habier J, Herold M,  
442 et al. Birth mode is associated with earliest strain-conferred gut microbiome functions  
443 and immunostimulatory potential. Nature Communications. 2018;9(1):5091.
- 444 43. Rutayisire E, Huang K, Liu Y, Tao F. The mode of delivery affects the diversity  
445 and colonization pattern of the gut microbiota during the first year of infants' life: a  
446 systematic review. BMC Gastroenterology. 2016;16(1):86.
- 447 44. Tamburini S, Shen N, Wu HC, Clemente JC. The microbiome in early life:  
448 implications for health outcomes. Nature Medicine. 2016;22:713.
- 449 45. Bayigga L, Kateete DP, Anderson DJ, Sekikubo M, Nakanjako D. Diversity of  
450 vaginal microbiota in sub-Saharan Africa and its effects on HIV transmission and  
451 prevention. American Journal of Obstetrics and Gynecology. 2018.
- 452 46. Tamarelle J, Thiébaud ACM, de Barbeyrac B, Bébéar C, Ravel J, Delarocque-  
453 Astagneau E. The vaginal microbiota and its association with human papillomavirus,  
454 Chlamydia trachomatis, Neisseria gonorrhoeae and Mycoplasma genitalium infections:  
455 a systematic review and meta-analysis. Clinical Microbiology and Infection.  
456 2019;25(1):35-47.
- 457 47. Callahan BJ, DiGiulio DB, Goltsman DSA, Sun CL, Costello EK, Jeganathan P,  
458 et al. Replication and refinement of a vaginal microbial signature of preterm birth in two  
459 racially distinct cohorts of US women. Proceedings of the National Academy of  
460 Sciences. 2017;114(37):9966.

461 **Supporting Information**

462 **S1 Fig. Principal coordinates analysis (PCoA) of vaginal microbiota from 13**

463 **mother/daughter pairs.** The  $\theta_{YC}$  distances between 101 vaginal microbiota samples

464 are represented by PCoA. Samples from daughters are represented by triangles and

465 samples from mothers by circles. Each mother/daughter pair is represented by a unique

466 color. Biplot arrows represent the 3 OTUs most correlated with position on the PCoA

467 plot.

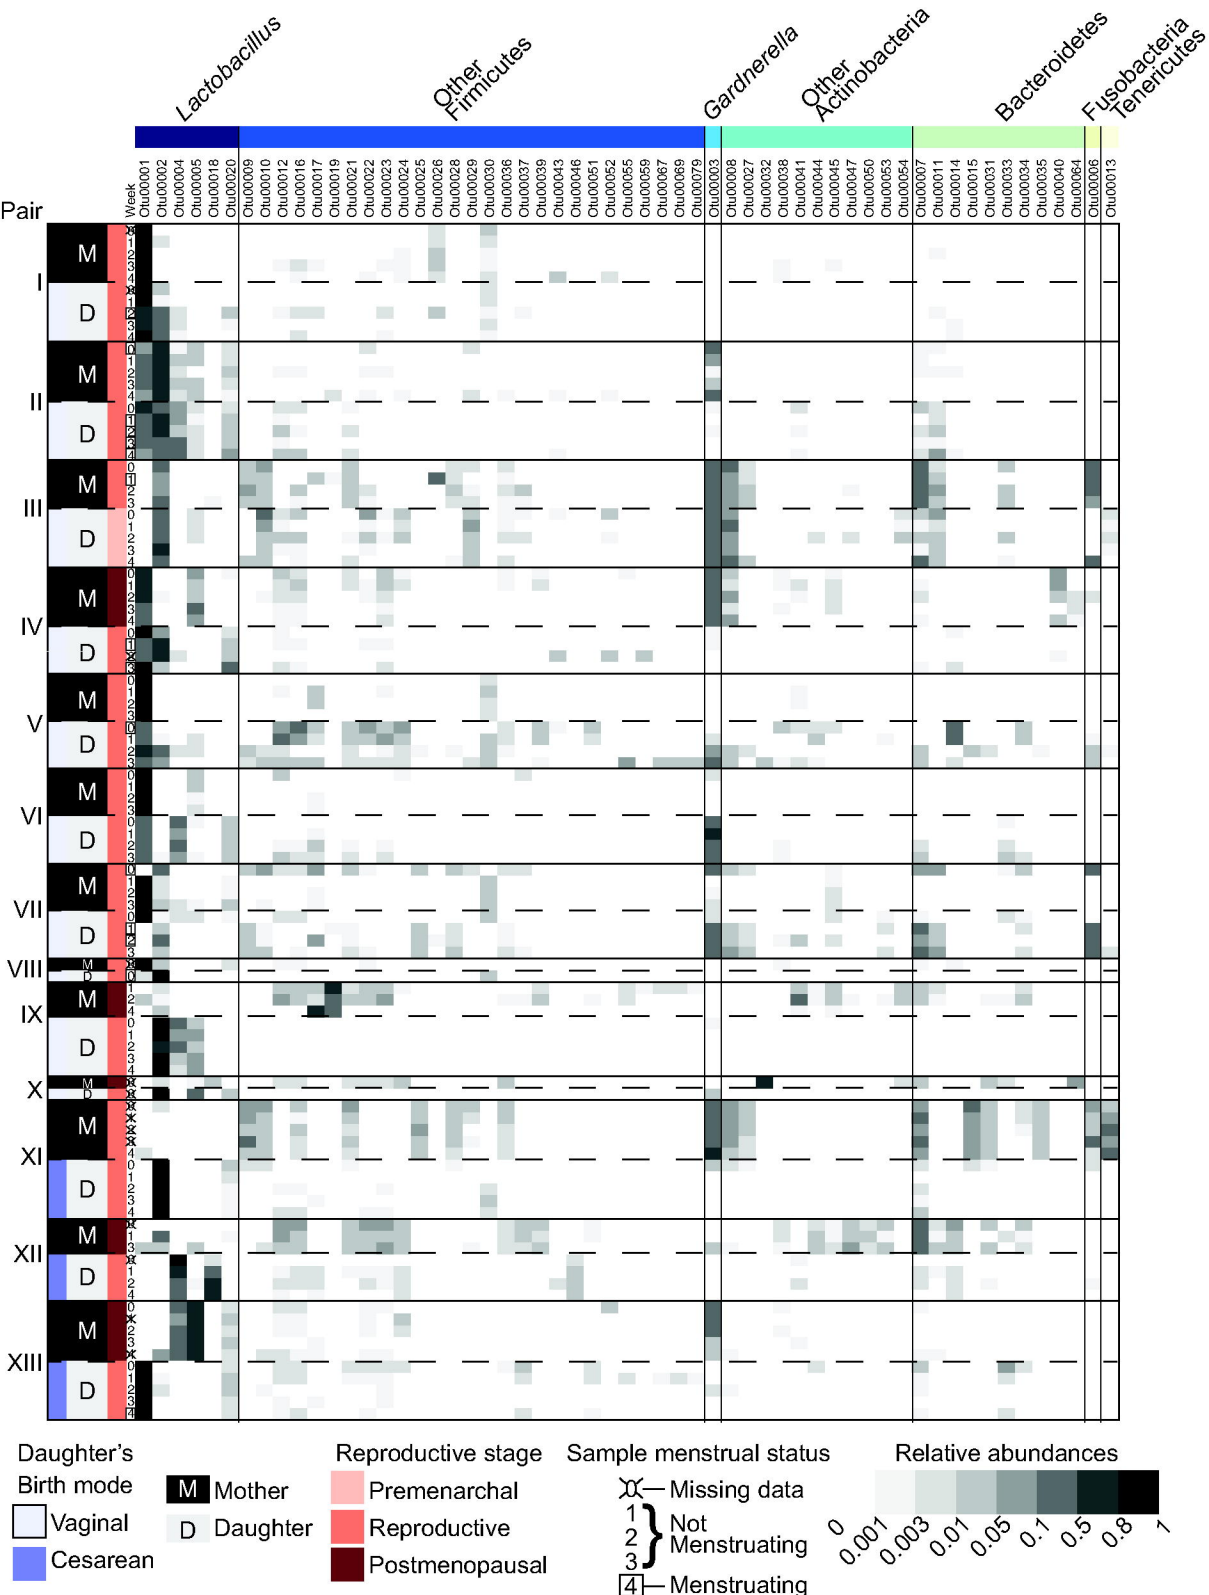

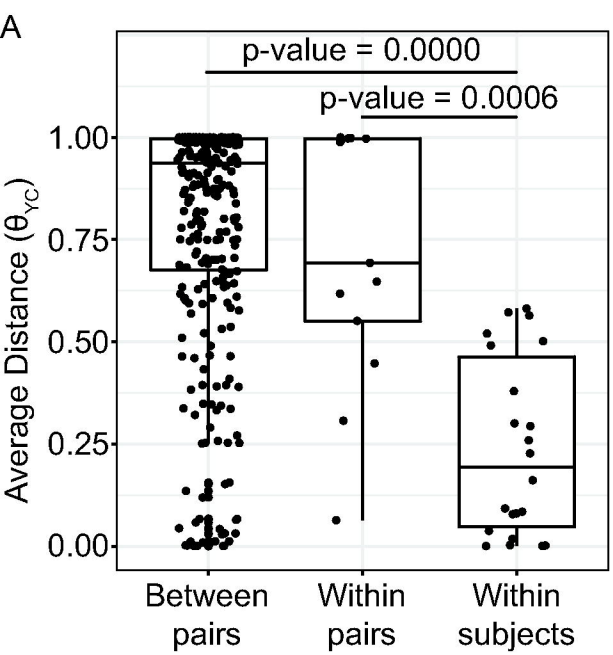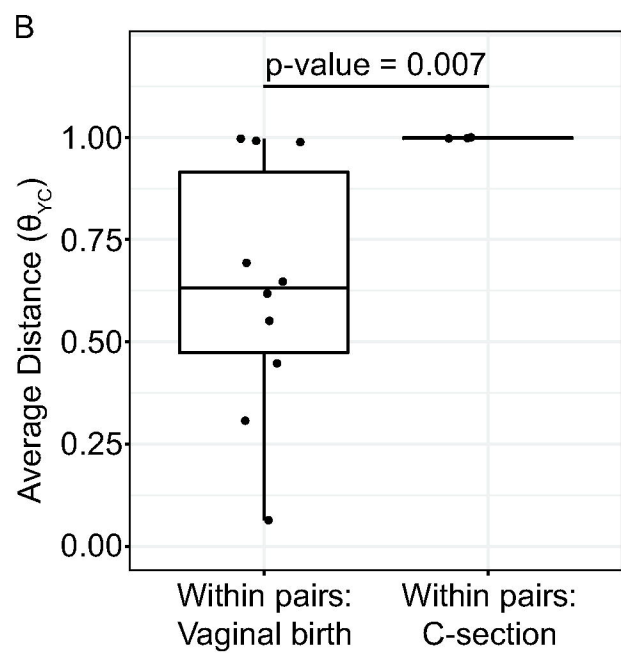



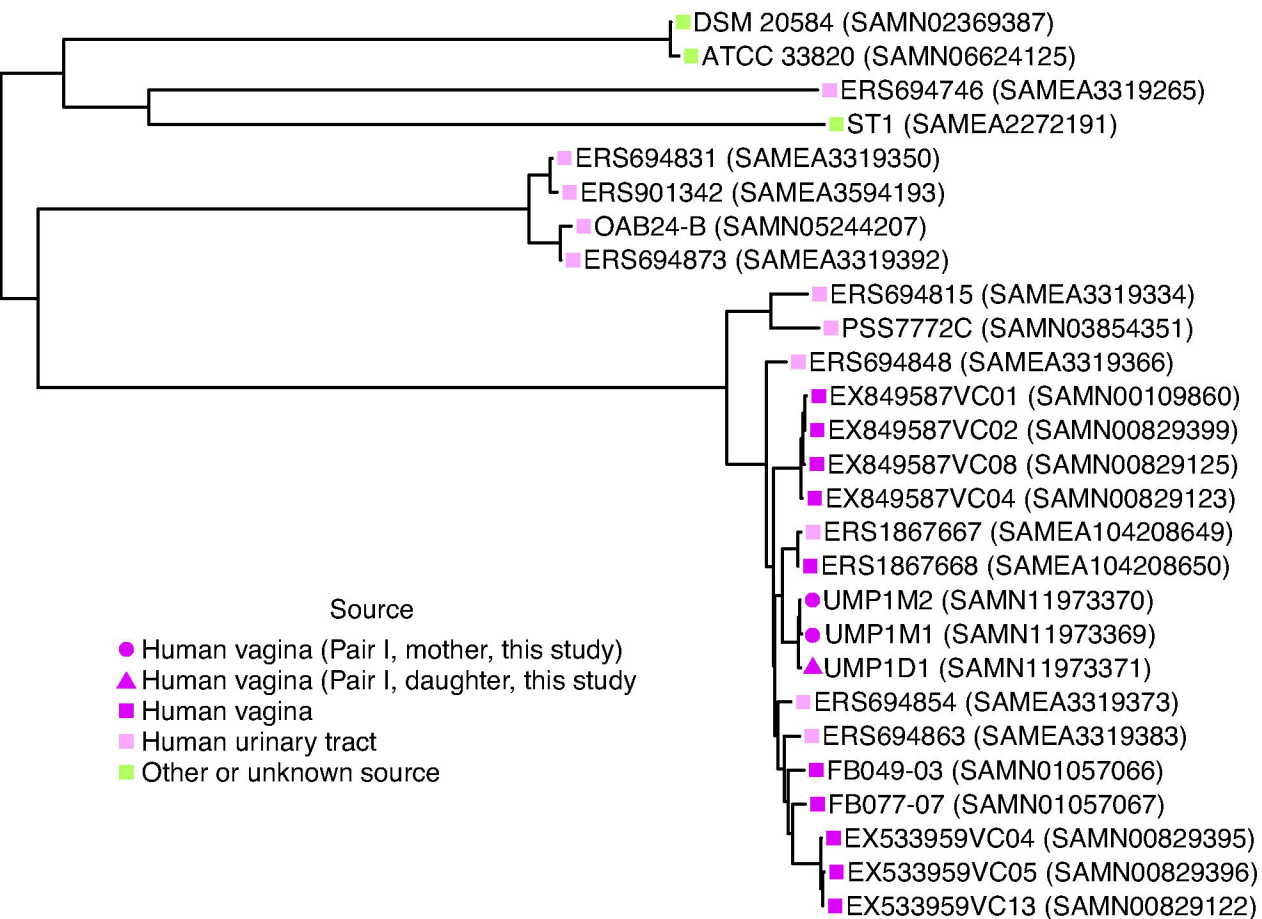

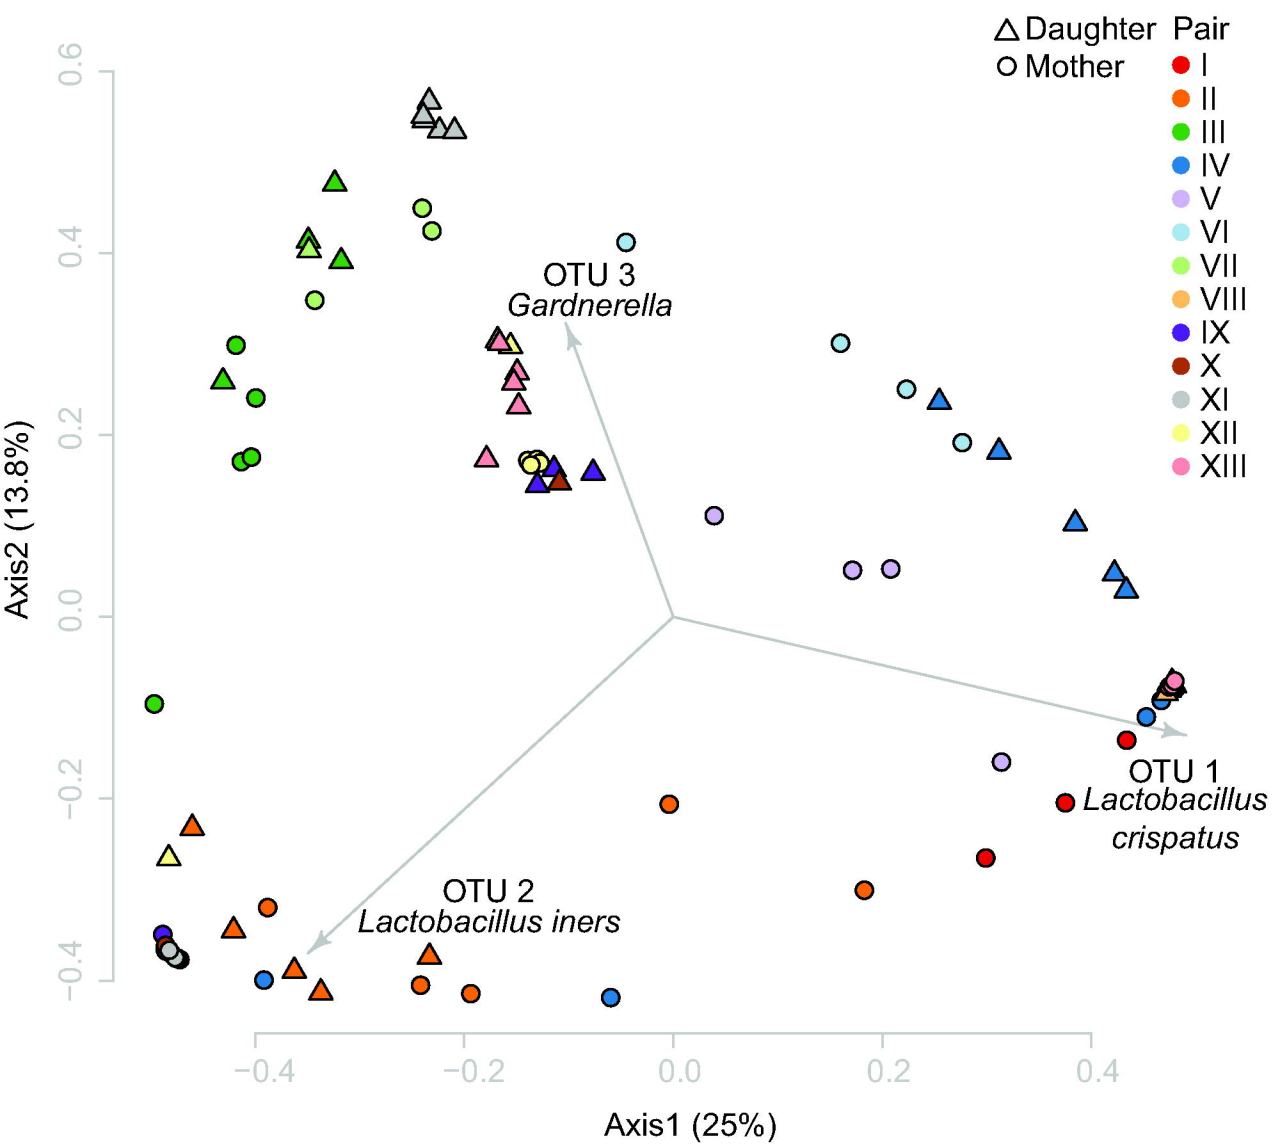

Source: https://www.biorxiv.org/content/10.1101/768598v2.full.pdf
